# Supplementary material for: D-O-A based organic phosphors for both aggregation-induced electrophosphorescence and host-free sensitization
Source: PubMed Central journal article supplement (PMC10039947; doi:10.1038/s41467-023-37414-y), 2023-03-25
Supplement: 41467_2023_37414_MOESM1_ESM.pdf [file 41467_2023_37414_MOESM1_ESM.pdf]

## **SUPPLEMENTARY INFORMATION**

**D-O-A based organic phosphors for both aggregation-induced  
electrophosphorescence and host-free sensitization**

## Supplementary methods

**Synthesis:** All reagents were purchased from commercial channels, and used directly unless specifically mentioned. *N,N*-dimethylformamide (DMF), toluene and *N*-methyl pyrrolidone (NMP) were purified according to the standard procedures. 2-(4-fluorophenyl)-4,6-diphenyl-1,3,5-triazine was purchased from Shanghai Haoyuan Chem express Co. Ltd. with a purity of 98%.

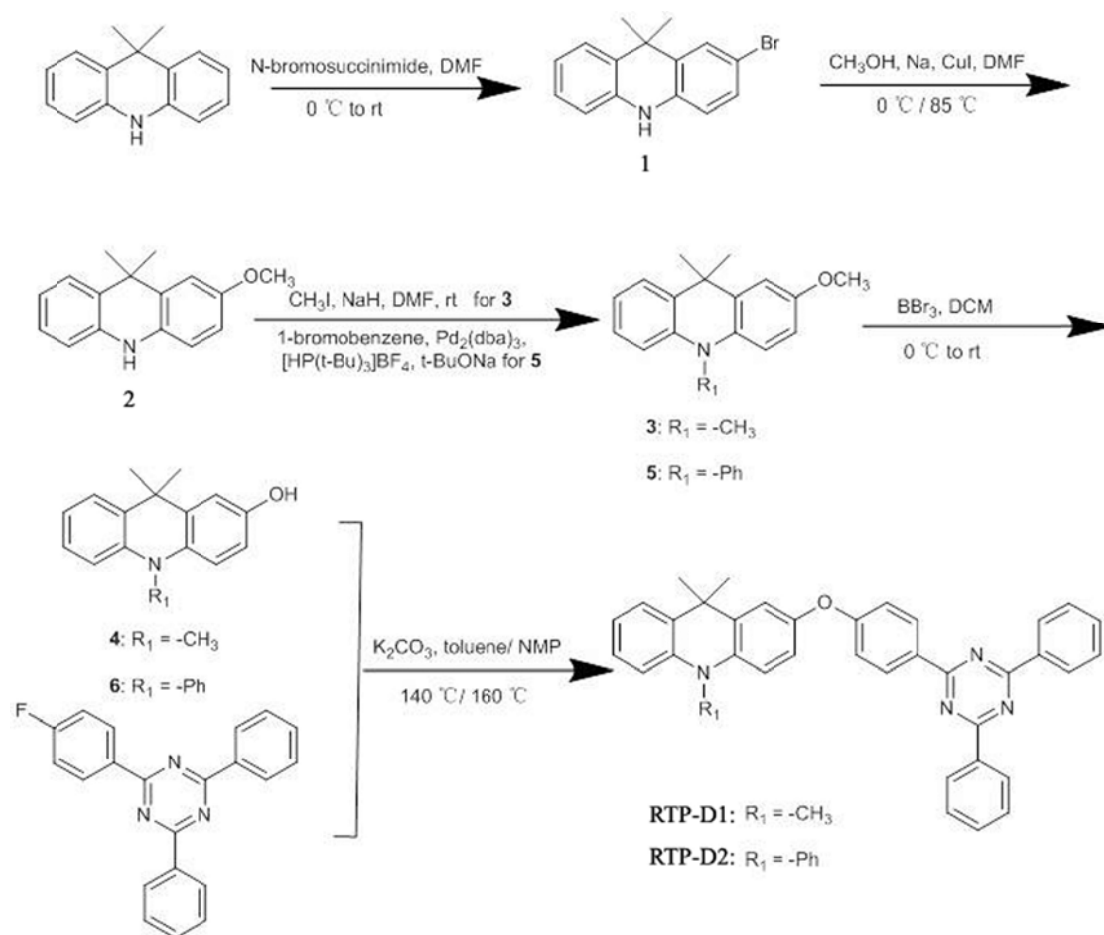

**Supplementary Figure 1.** Synthesis routes of RTP-D1 and RTP-D2.

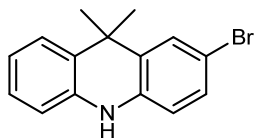

*2-Bromo-9,10-dihydro-9,9-dimethylacridine* (**1**): N-bromosuccinimide (18.60 g, 105.12 mmol) was slowly added into a solution of 9,9-dimethyl-9,10-dihydroacridine (20.90 g, 99.94 mmol) in 120 mL dry DMF at 0 °C. Then the system was stirred for 2 h at room temperature. After addition of 300 mL water, the mixture was extracted with dichloromethane, and washed with aqueous brine. The separated organic layer was dried over sodium sulfate, filtered and purified by column chromatography on silica gel using petroleum ether/dichloromethane (v/v 5:1) as the eluent to give a white solid **1** (19.00 g, 93%). <sup>1</sup>H NMR (400 MHz, CDCl<sub>3</sub>, δ ppm): 7.47 (d, *J* = 2.1 Hz, 1H), 7.40 (dd, *J* = 7.8, 0.9 Hz, 1H), 7.20 (dd, *J* = 8.4, 2.1 Hz, 1H), 7.13 (td, *J* = 7.8, 1.3 Hz, 1H), 6.95 (t, *J* = 7.4 Hz, 1H), 6.70 (d, *J* = 7.8 Hz, 1H), 6.58 (d, *J* = 8.4 Hz, 1H), 6.16 (brs, 1H), 1.57 (s, 6H). <sup>13</sup>C NMR (100 MHz, CDCl<sub>3</sub>): 138.0, 137.6, 137.1, 131.3, 130.7, 129.7, 129.5, 128.5, 127.0, 125.5, 121.1, 115.0, 113.6, 36.4, 30.5. HR-ESI-MS (*m/z*): [M+H]<sup>+</sup> calcd. for C<sub>15</sub>H<sub>15</sub>BrN, 288.0382; Found, 288.0385.

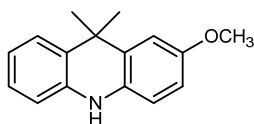

*9,10-Dihydro-2-methoxy-9,9-dimethylacridine* (**2**): Sodium lumps (7.97 g, 346.81 mmol) were cut up and slowly added in a 250 mL round-bottom flask containing 100 mL dry methanol under argon atmosphere. After dissolved completely, the mixture was transferred into a flame-dried two-necked round-bottom flask with a solution of

2-bromo-9,10-dihydro-9,9-dimethylacridine (**1**) (9.01 g, 31.39 mmol) and CuI (17.80 g, 93.46 mmol) in 150 mL dry DMF. The reaction mixture was heated at 85 °C for 10 h. When cooled to room temperature, the system was filtered, poured into water and extracted by dichloromethane. After removing the solvent, the crude produce was purified by silica gel column chromatography to give a white crystal **2** (3.71 g, 56%). <sup>1</sup>H NMR (400 MHz, DMSO-*d*<sub>6</sub>, δ ppm): 8.62 (s, 1H), 7.30 (d, *J* = 7.5 Hz, 1H), 7.01 (t, *J* = 8.0 Hz, 1H), 6.91 (d, *J* = 2.4 Hz, 1H), 6.70 - 6.77 (m, 4H), 3.70 (s, 3H), 1.47 (s, 6H). <sup>13</sup>C NMR (100 MHz, DMSO-*d*<sub>6</sub>): 153.3, 139.4, 132.9, 129.3, 127.2, 126.6, 125.5, 119.1, 114.0, 113.2, 112.3, 111.3, 55.4, 36.0, 30.8. HR-ESI-MS (*m/z*): [M+H]<sup>+</sup> calcd. for C<sub>16</sub>H<sub>18</sub>NO, 240.1383; Found, 240.1383.

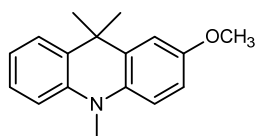

*9,10-Dihydro-2-methoxy-9,9-dimethyl-10-methylacridine* (**3**): A mixture of 9,10-dihydro-2-methoxy-9,9-dimethylacridine (**2**) (2.21 g, 9.24 mmol) and sodium hydride (0.35 g, 14.72 mmol) and dry THF (60 mL) was stirred at room temperature for 1h. Then iodomethane (1.57 g, 11.04 mmol) was injected into the mixture, and reacted for 6 h. The mixture was slowly poured into 150 mL water, and extracted three times with dichloromethane. And a colorless transparent oily liquid **3** (2.28 g, 98%) was obtained after removing the solvent. <sup>1</sup>H NMR (400 MHz, CDCl<sub>3</sub>, δ ppm): 7.31 (dd, *J* = 7.7, 1.6 Hz, 1H), 7.12-7.16 (m, 1H), 6.93 (d, *J* = 2.8 Hz, 1H), 6.88 (td, *J* = 7.5, 1.0 Hz, 1H), 6.82 (d, *J* = 8.1 Hz, 1H), 6.77 (d, *J* = 8.7 Hz, 1H), 6.69 (dd, *J* = 8.7,

2.8 Hz, 1H) 3.72 (s, 3H), 3.32 (s, 3H), 1.44 (s, 6H).  $^1\text{H}$  NMR (100 MHz,  $\text{CDCl}_3$ ): 154.2, 136.6, 134.3, 132.0, 126.6, 123.6, 120.1, 112.4, 111.7, 110.8, 110.5, 55.7, 36.7, 33.3, 27.0. HR-ESI-MS ( $m/z$ ):  $[\text{M}+\text{H}]^+$  calcd. for  $\text{C}_{17}\text{H}_{20}\text{NO}$ , 254.1539; Found, 254.1537.

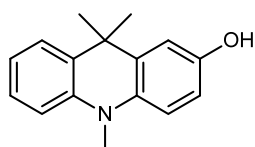

*9,10-Dihydro-9,9-dimethyl-10-methyl-2-acridinol* (**4**): Boron tribromide (0.67 mL, 18.04 mmol) was injected into a 100 mL two-necked round-bottom flask containing a solution of *9,10-Dihydro-2-methoxy-9,9-dimethyl-10-methylacridine* (**3**) (2.28 g, 9.02 mmol) in dry dichloromethane (45 mL) at 0 °C. After stirred at room temperature for 4 h, the mixture was slowly poured into 100 mL water and extracted three times with dichloromethane. After removing the solvent, the crude produce was purified by silica gel column chromatography using petroleum ether/dichloromethane/acetone (v/v/v 100/50/1) as the eluent to afford a white powder **4** (1.92 g, 89%).  $^1\text{H}$  NMR (400 MHz,  $\text{DMSO}-d_6$ ,  $\delta$  ppm): 8.84 (s, 1H), 7.35 (d,  $J = 7.7$  Hz, 1H), 7.17 (t,  $J = 7.7$  Hz, 1H), 6.88 - 6.94 (m, 2H), 6.81 - 6.84 (m, 2H), 6.63 (dd,  $J = 8.7, 2.7$  Hz, 1H), 3.32 (s, 3H), 1.41 (s, 6H).  $^{13}\text{C}$  NMR (100 MHz,  $\text{DMSO}-d_6$ ): 152.2, 142.9, 135.2, 133.8, 131.9, 127.0, 123.9, 120.2, 113.4, 113.2, 112.2, 111.2, 36.6, 33.6, 27.4. HR-ESI-MS ( $m/z$ ):  $[\text{M}+\text{H}]^+$  calcd. for  $\text{C}_{18}\text{H}_{16}\text{NO}$ , 240.1383; Found, 240.1382.

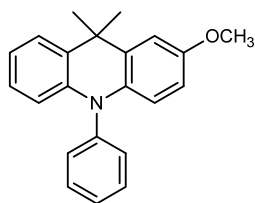

9,10-Dihydro-2-methoxy-9,9-dimethyl-10-phenylacridine (**5**): Under argon atmosphere, 1-bromobenzene (0.69 mL, 6.56 mmol) was poured into a 100 mL two-necked round-bottom flask containing tris (dibenzylideneacetone) dipalladium (0.20 g, 0.22 mmol), tri-tert-butylphosphine tetrafluoroborate (0.32 g, 1.10 mmol), sodium tert-butoxide (1.31 g, 13.67 mmol), 9,10-dihydro-2-methoxy-9,9-dimethylacridine (**2**) (1.31 g, 5.47 mmol) and toluene (60 mL). The mixture was stirred and reflux at 115 °C for 10 h. When cooled to room temperature, 180 mL water was added, and the mixture was extracted with dichloromethane for three times. After removing the solvent, the crude produce was purified by silica gel column chromatography using petroleum ether/dichloromethane (v/v 10:1) as the eluent to give a white powder **5** (1.60 g, 96%). <sup>1</sup>H NMR (400 MHz, CDCl<sub>3</sub>, δ ppm): 7.61-7.64 (m, 2H), 7.44-7.44 (m, 2H), 7.34-7.36 (m, 2H), 7.06-7.10 (m, 1H), 6.89-7.00 (m, 2H), 6.55-6.59 (m, 1H), 6.20-6.29 (m, 2H), 3.79 (s, 3H), 1.70 (s, 6H). <sup>13</sup>C NMR (100 MHz, CDCl<sub>3</sub>): 154.0, 141.5, 141.2, 135.4, 131.4, 131.3, 130.8, 129.1, 128.0, 126.3, 125.1, 120.0, 114.5, 113.7, 111.6, 110.9, 55.6, 36.2, 30.8. HR-ESI-MS (*m/z*): [M+H]<sup>+</sup> calcd. for C<sub>22</sub>H<sub>22</sub>NO, 316.1696; Found, 316.1694.

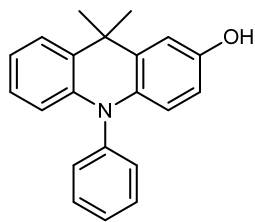

*9,10-Dihydro-9,9-dimethyl-10-phenyl-2-acridinol* (**6**): According to the same procedure of **4**, the hydroxyl intermediate **6** was synthesized by Boron tribromide (0.43 mL, 11.54 mmol) and 9,10-Dihydro-9,9-dimethyl-10-methyl-2-acridinol (**5**) (1.82 g, 5.77 mmol), and purified by silica gel column chromatography using petroleum ether/ethyl acetate (v/v 30:1) as the eluent to give a white powder (1.62 g, 93%). <sup>1</sup>H NMR (400 MHz, DMSO-*d*<sub>6</sub>, δ ppm): 8.89 (s, 1H), 7.67 (t, *J* = 7.7 Hz, 2H), 7.53 (t, *J* = 7.4 Hz, 1H), 7.44 (d, *J* = 7.7 Hz, 1H), 7.33 (d, *J* = 7.4 Hz, 2H), 6.91-6.95 (m, 2H), 6.84 (td, *J* = 7.4, 1.0 Hz, 1H), 6.43 (dd, *J* = 8.8, 2.7 Hz, 1H), 6.12 (d, *J* = 8.2 Hz, 1H), 5.98 (d, *J* = 8.8 Hz, 1H), 1.58 (s, 6H). <sup>13</sup>C NMR (100 MHz, DMSO-*d*<sub>6</sub>): 152.1, 141.6, 141.4, 133.9, 131.5, 131.3, 129.3, 128.6, 126.8, 125.7, 120.2, 115.0, 113.6, 113.5, 112.3, 36.2, 31.2. HR-ESI-MS (*m/z*): [M+H]<sup>+</sup> calcd. for C<sub>21</sub>H<sub>20</sub>NO, 302.1539; Found, 547.1537.

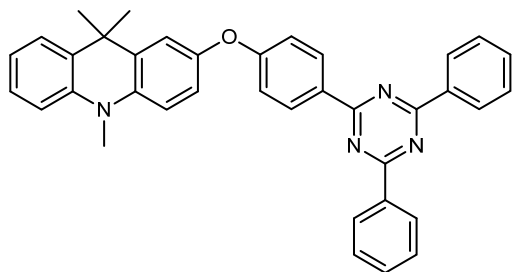

*Synthesis of RTP-D1*: 9,10-Dihydro-9,9-dimethyl-10-methyl-2-acridinol (**4**: 1.92 g, 8.03 mmol), K<sub>2</sub>CO<sub>3</sub> (1.66 g, 12.04 mmol), 15 mL dry NMP and 15 mL dry toluene were added into a 100 mL three-necked round-bottom flask, and refluxed 140 °C for 2

h under argon atmosphere. When cooled to room temperature, 2-(4-fluorophenyl)-4,6-diphenyl-1,3,5-triazine (2.28 g, 6.98 mmol) dissolved in 15 mL dry NMP was added. The mixture was heated to 160 °C and reacted for another 8 h. After extracted with dichloromethane and removing the solvent, the crude product was purified by silica gel column chromatography using petroleum ether/dichloromethane (v/v 7:1) as the eluent to afford a white powder RTP-D1 (2.36 g, 62%). <sup>1</sup>H NMR (500 MHz, CDCl<sub>3</sub>, δ ppm): 8.75 (m, 6H), 7.59 (m, 6H), 7.43 (dd, *J* = 7.6, 1.5 Hz, 1H), 7.29 (m, 1H), 7.24 (d, *J* = 2.6 Hz, 1H), 7.10 (m, 2H), 6.97-7.05 (m, 4H), 3.50 (s, 3H), 1.56 (s, 6H). <sup>13</sup>C NMR (125 MHz, CDCl<sub>3</sub>, δ ppm): 171.48, 171.13, 162.97, 149.40, 142.25, 139.53, 136.36, 134.71, 132.08, 130.92, 129.95, 128.93, 128.62, 126.81, 123.74, 120.78, 118.43, 116.73, 116.53, 112.99, 112.14, 36.84, 33.58, 27.12. HR-ESI-MS (*m/z*): [M+H]<sup>+</sup> calcd. for C<sub>37</sub>H<sub>31</sub>N<sub>4</sub>O, 547.2492; Found, 547.2496. Elemental analysis calcd. (%) for C<sub>37</sub>H<sub>30</sub>N<sub>4</sub>O: C, 81.29; H, 5.53; N, 10.25; Found: C, 81.58; H, 5.23; N, 10.25.

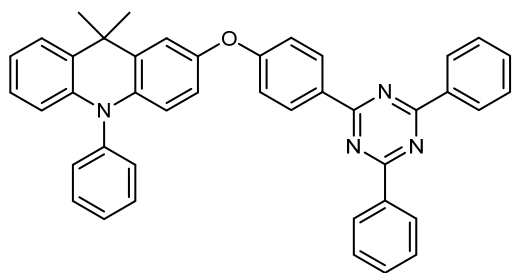

*Synthesis of RTP-D2:* According to the same procedure of RTP-D1, 15 mL dry NMP and 15 mL dry toluene were added in a 100 mL three-necked round-bottom flask including 9,10-Dihydro-9,9-dimethyl-10-phenyl-2-acridinol (**6**: 1.51 g, 5.02 mmol) and K<sub>2</sub>CO<sub>3</sub> (1.04 g, 7.53 mmol) under argon atmosphere, refluxed 140 °C for 2 h.



After cooling to room temperature, 2-(4-fluorophenyl)-4,6-diphenyl-1,3,5-triazine (1.98 g, 4.36 mmol) and 15 mL dry NMP was added. The mixture was heated to 160 °C overnight. The silica gel column chromatography with petroleum ether/dichloromethane (v/v 7:1) was used to obtain RTP-D2 (white powder, 1.92 g) in a yield of 60%. <sup>1</sup>H NMR (500 MHz, DMSO-*d*<sub>6</sub>, δ ppm): 8.71 (d, *J* = 8.3 Hz, 6H), 7.68 - 7.73 (m, 4H), 7.64 (t, *J* = 7.8 Hz, 4H), 7.59 (t, *J* = 7.5 Hz, 1H), 7.49 (dd, *J* = 7.6, 1.6 Hz, 1H), 7.42 (d, *J* = 7.4 Hz, 2H), 7.35 (d, *J* = 2.8 Hz, 1H), 7.13 (d, *J* = 8.9 Hz, 2H), 6.99 (td, *J* = 7.5, 1.5 Hz, 1H), 6.91 (td, *J* = 7.5, 1.2 Hz, 1H), 6.86 (dd, *J* = 8.9, 2.7 Hz, 1H), 6.23 (d, *J* = 8.9 Hz, 1H), 6.17 (dd, *J* = 8.3, 1.2 Hz, 1H), 1.64 (s, 6H). <sup>13</sup>C NMR (125 MHz, DMSO-*d*<sub>6</sub>, δ ppm): 170.83, 170.44, 162.19, 148.51, 140.58, 140.17, 137.54, 135.39, 132.63, 131.49, 130.92, 130.72, 130.66, 129.19, 128.85, 128.66, 128.42, 128.29, 126.31, 125.09, 120.43, 118.21, 117.27, 116.62, 114.74, 113.45, 35.71, 30.80. HR-ESI-MS (*m/z*): [M+H]<sup>+</sup> calcd. for C<sub>42</sub>H<sub>33</sub>N<sub>4</sub>O, 609.2649; Found, 609.2647. Elemental analysis calcd. (%) for C<sub>42</sub>H<sub>32</sub>N<sub>4</sub>O: C, 82.87; H, 5.30; N, 9.20; Found C, 82.58; H, 5.24; N, 8.96.

## Supplementary Figures

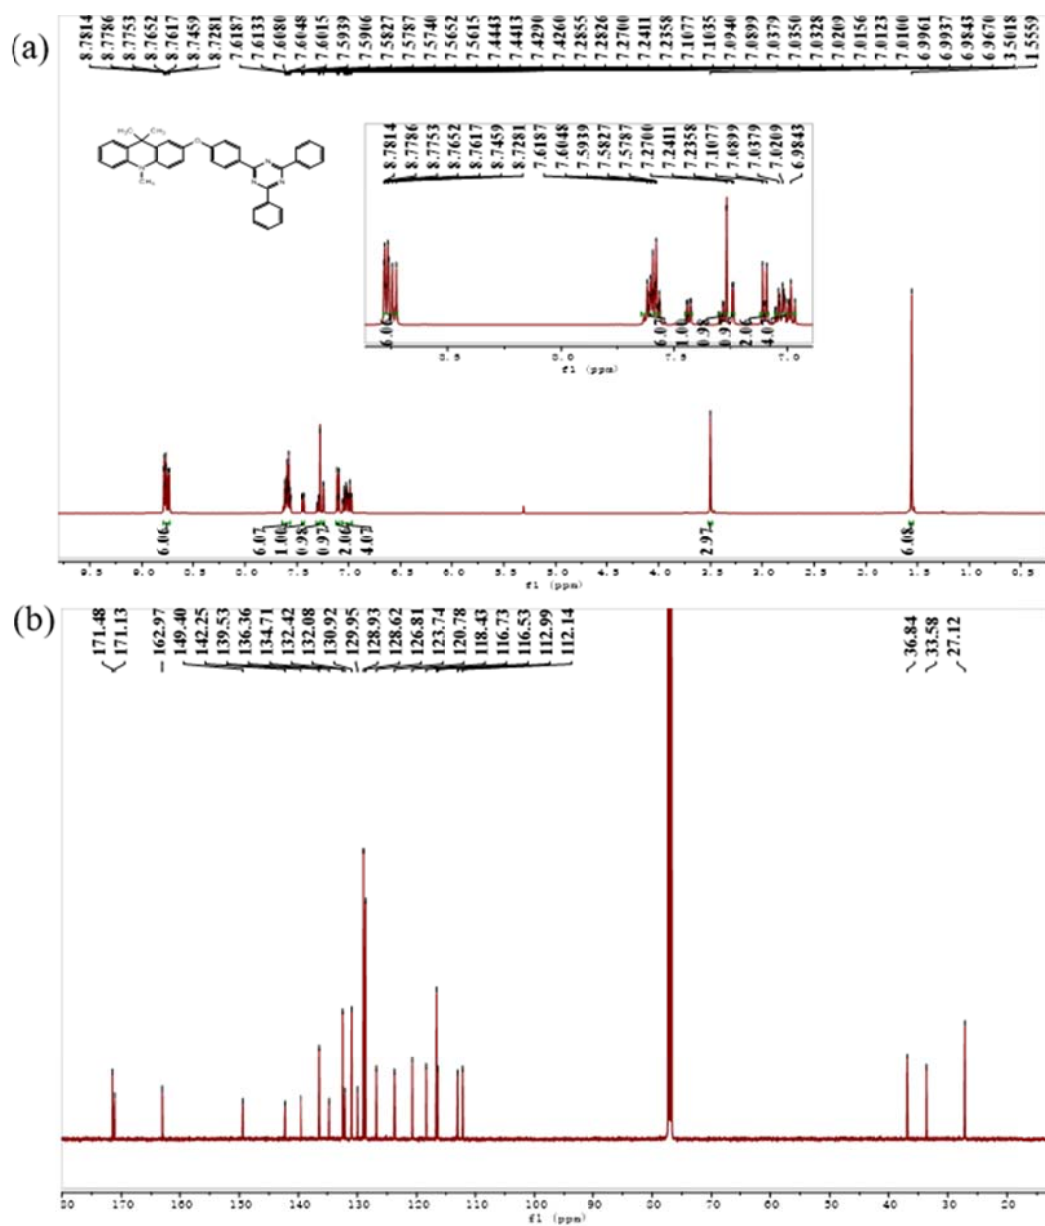

Supplementary Figure 2. <sup>1</sup>H (a) and <sup>13</sup>C NMR spectra (b) of RTP-D1.

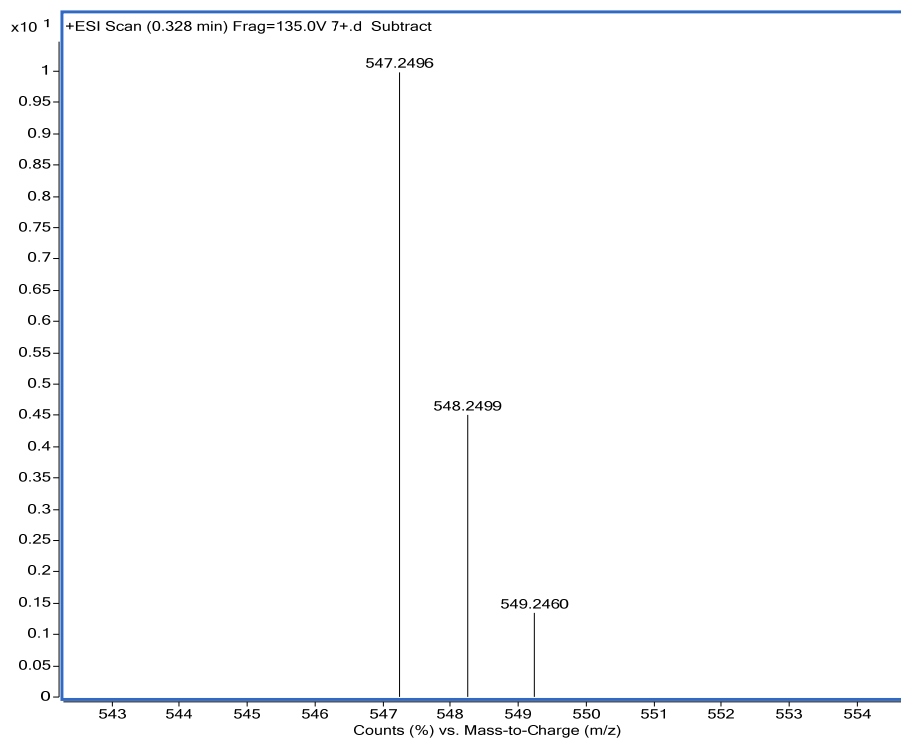

**Supplementary Figure 3.** HR-ESI-MS spectrum of RTP-D1.

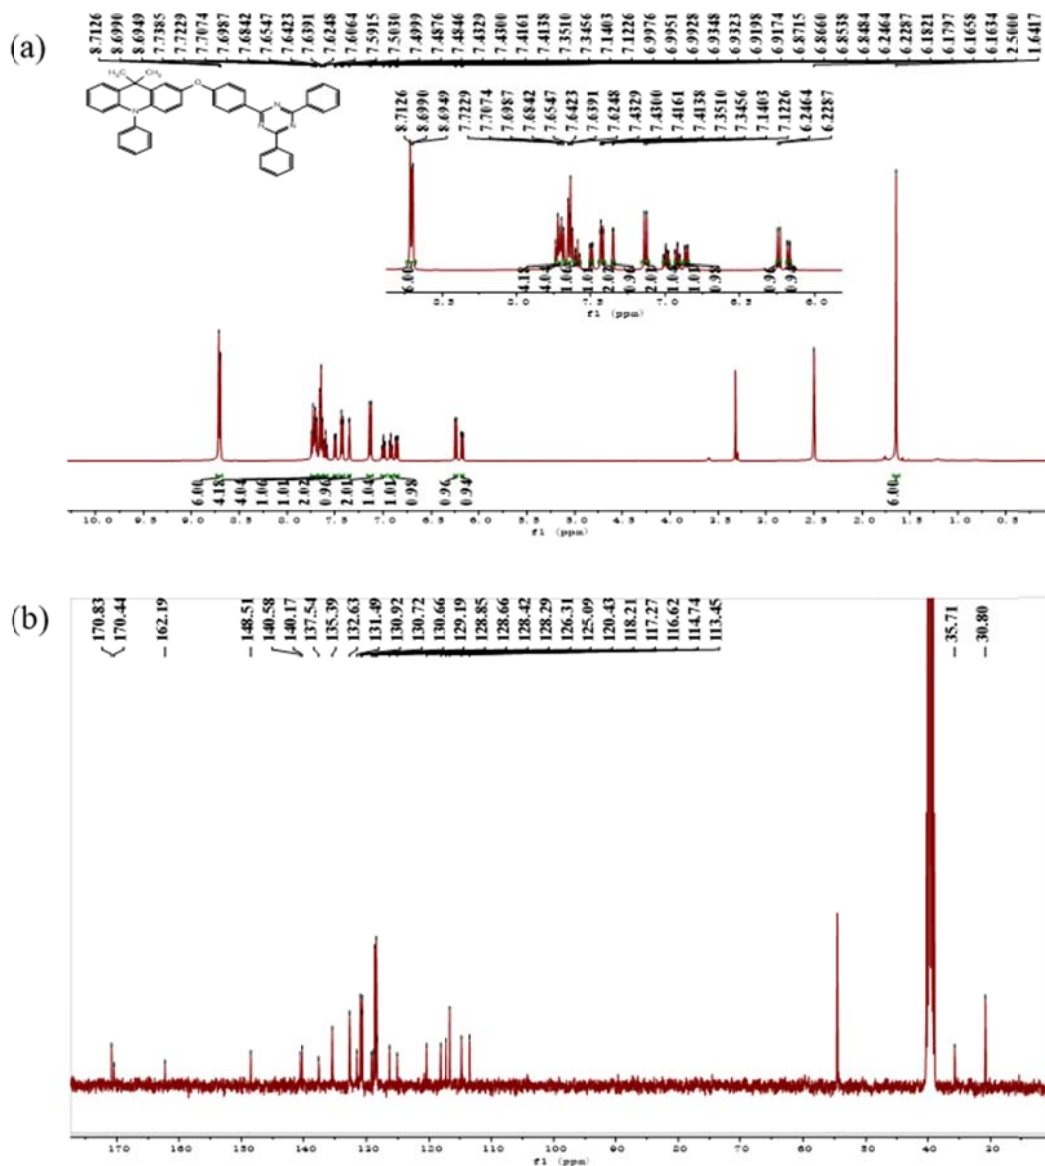

Supplementary Figure 4.  $^1\text{H}$  (a) and  $^{13}\text{C}$  NMR spectra (b) of RTP-D2.

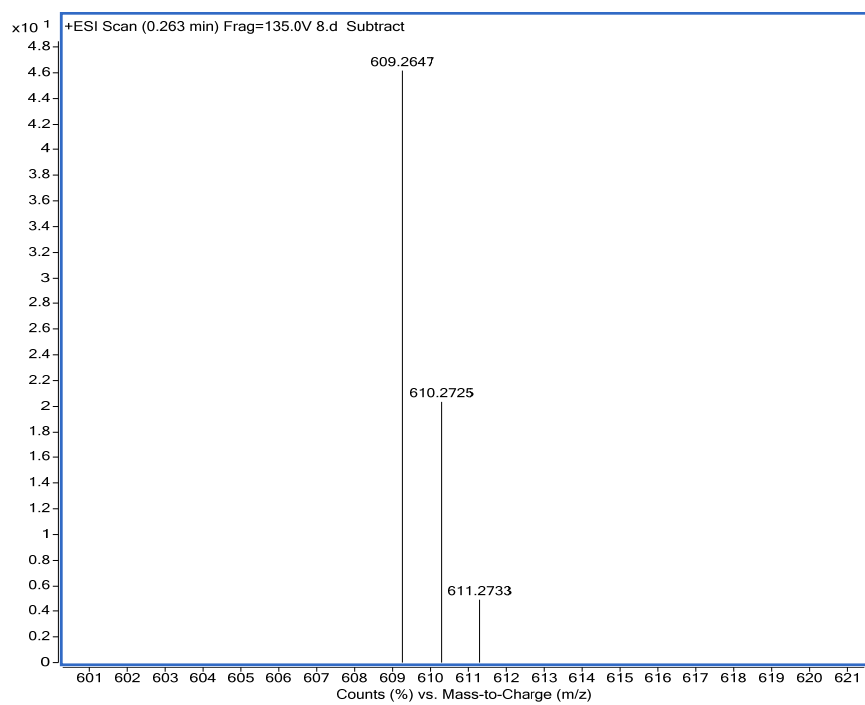

**Supplementary Figure 5.** ESI-MS spectrum of RTP-D2.

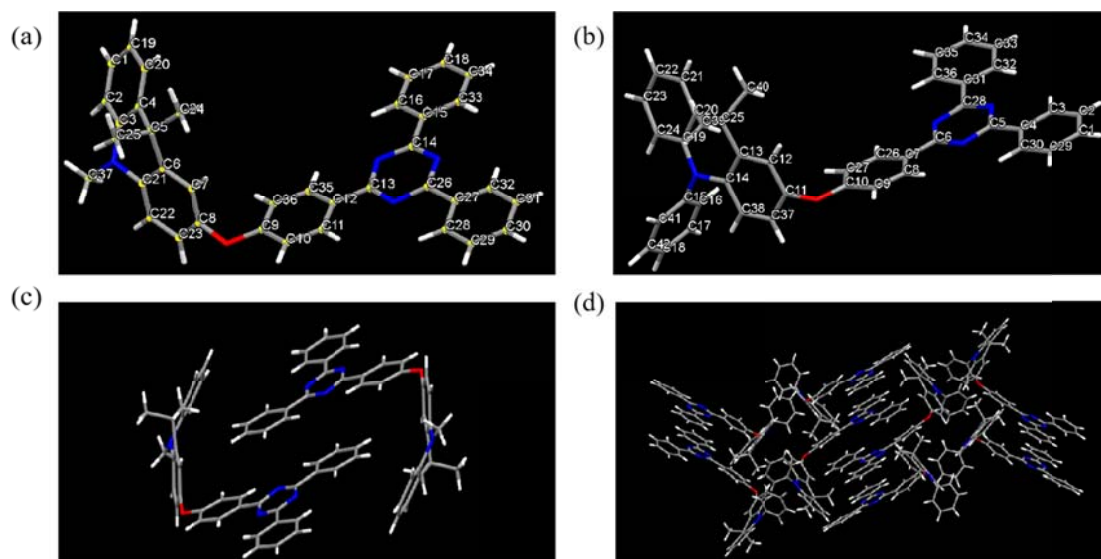

**Supplementary Figure 6.** Single crystal structures and packing modes of RTP-D1 (a and c) and RTP-D2 (b and d).

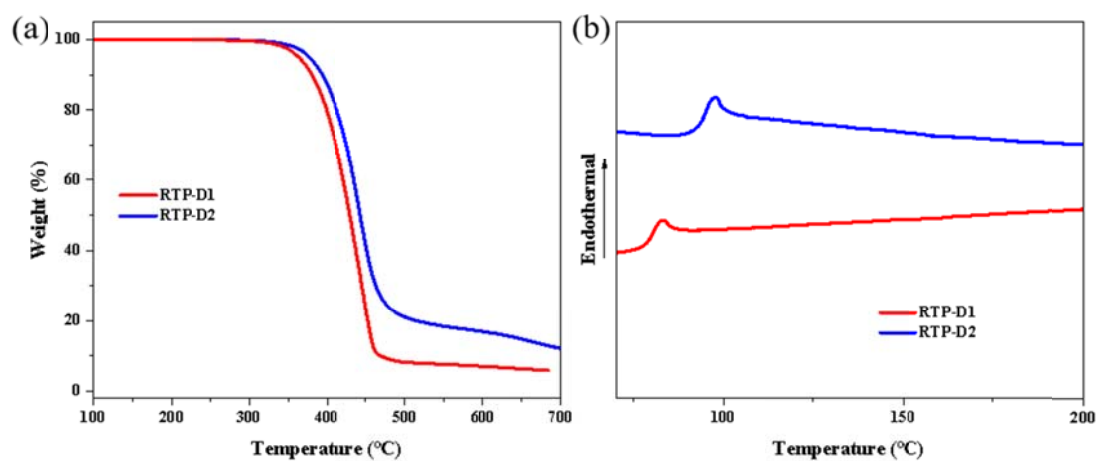

Supplementary Figure 7. TGA (a) and DSC traces (b) for RTP-D1 and RTP-D2.

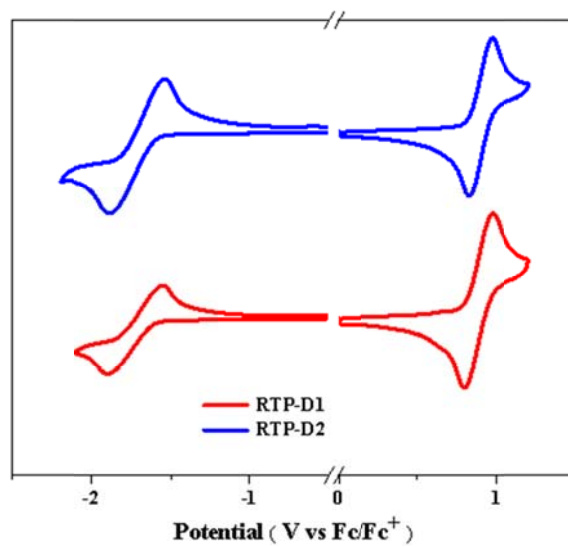

**Supplementary Figure 8.** CV curves of RTP-D1 and RTP-D2.



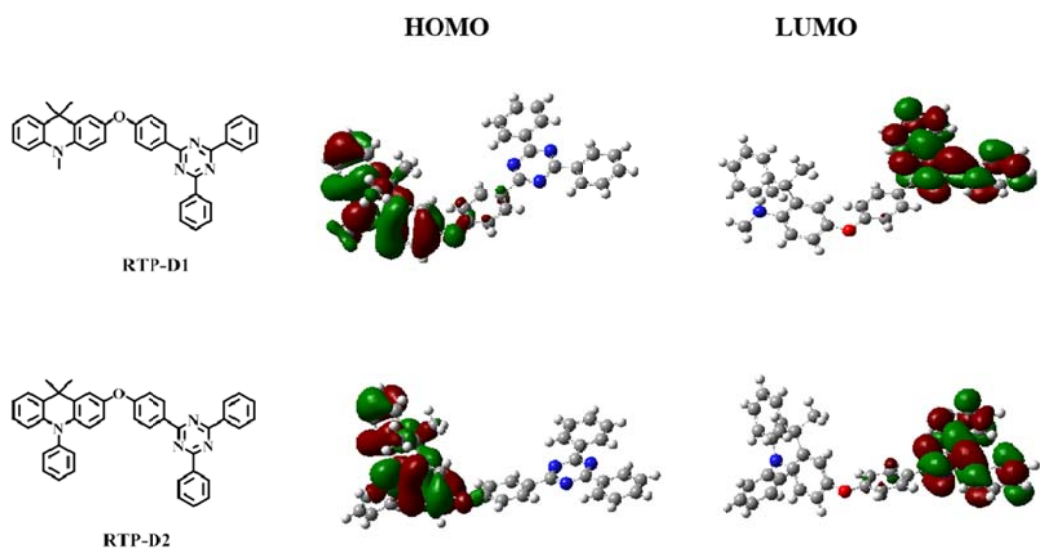

**Supplementary Figure 9.** Calculated HOMO and LUMO distributions for RTP-D1 and RTP-D2.

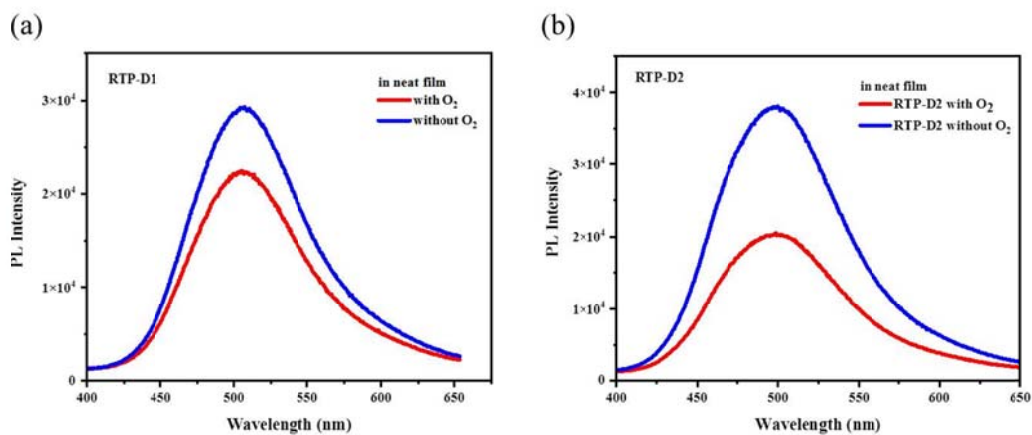

**Supplementary Figure 10.** The O<sub>2</sub> dependence of the PL spectra in neat films for RTP-D1 (a) and RTP-D2 (b). The PL spectra of RTP-D1 and RTP-D2 are found to be sensitive to O<sub>2</sub>, indicative of the triplet exciton origin to some degree.

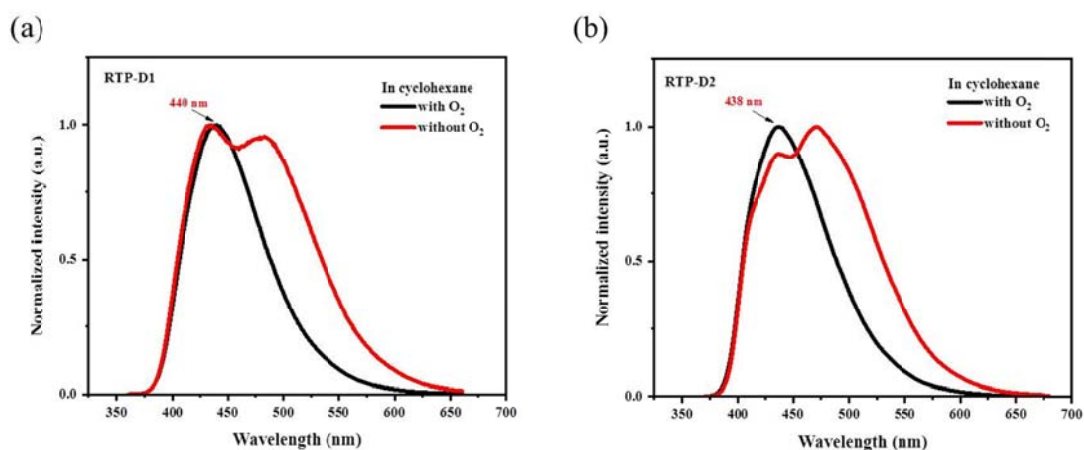

**Supplementary Figure 11.** The  $O_2$  dependence of the PL spectra in cyclohexane ( $10^{-5}$  mol  $L^{-1}$ ) for RTP-D1 (a) and RTP-D2 (b). As one can see, both RTP-D1 and RTP-D2 show two distinct emission bands in the absence of  $O_2$ . Assumed that the emission corresponding to the triplet excitons could be completely quenched by  $O_2$  in dilute solution, the long-wavelength band is reasonably from the triplet exciton related RTP.

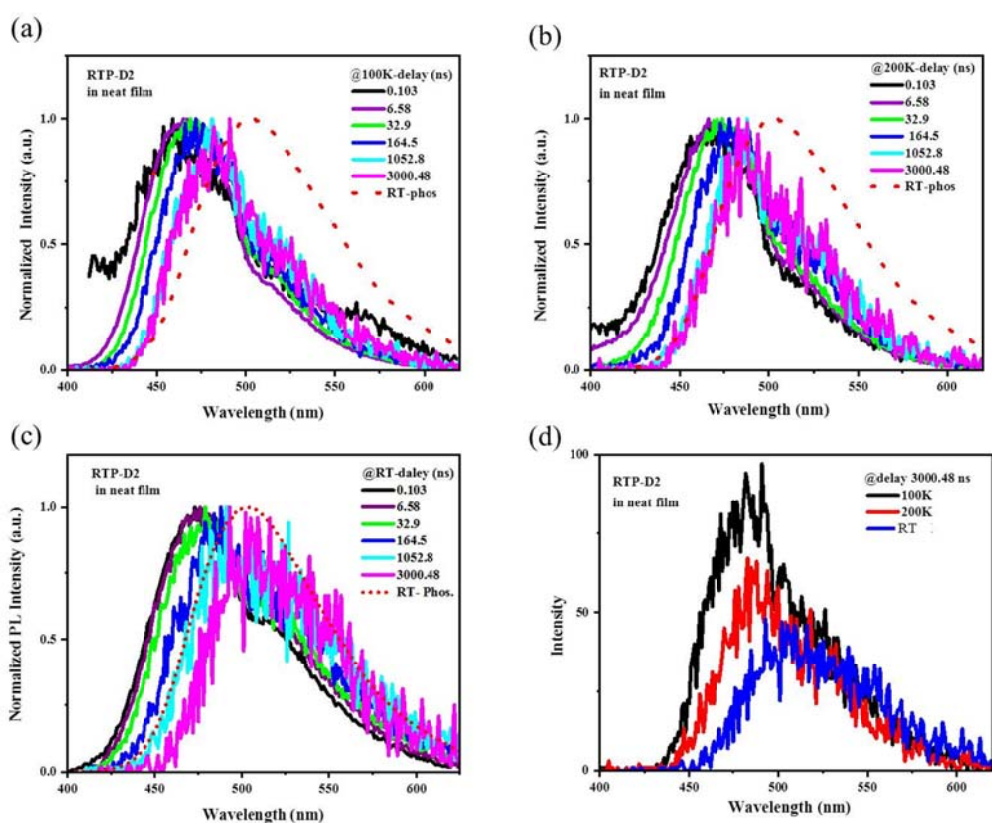

**Supplementary Figure 12.** TRES for the RTP-D2 film: (a) at 100 K; (b) at 200 K; (c) at room temperature; (d) Intensity comparison of the curves at a delay time of 3000.48 ns.

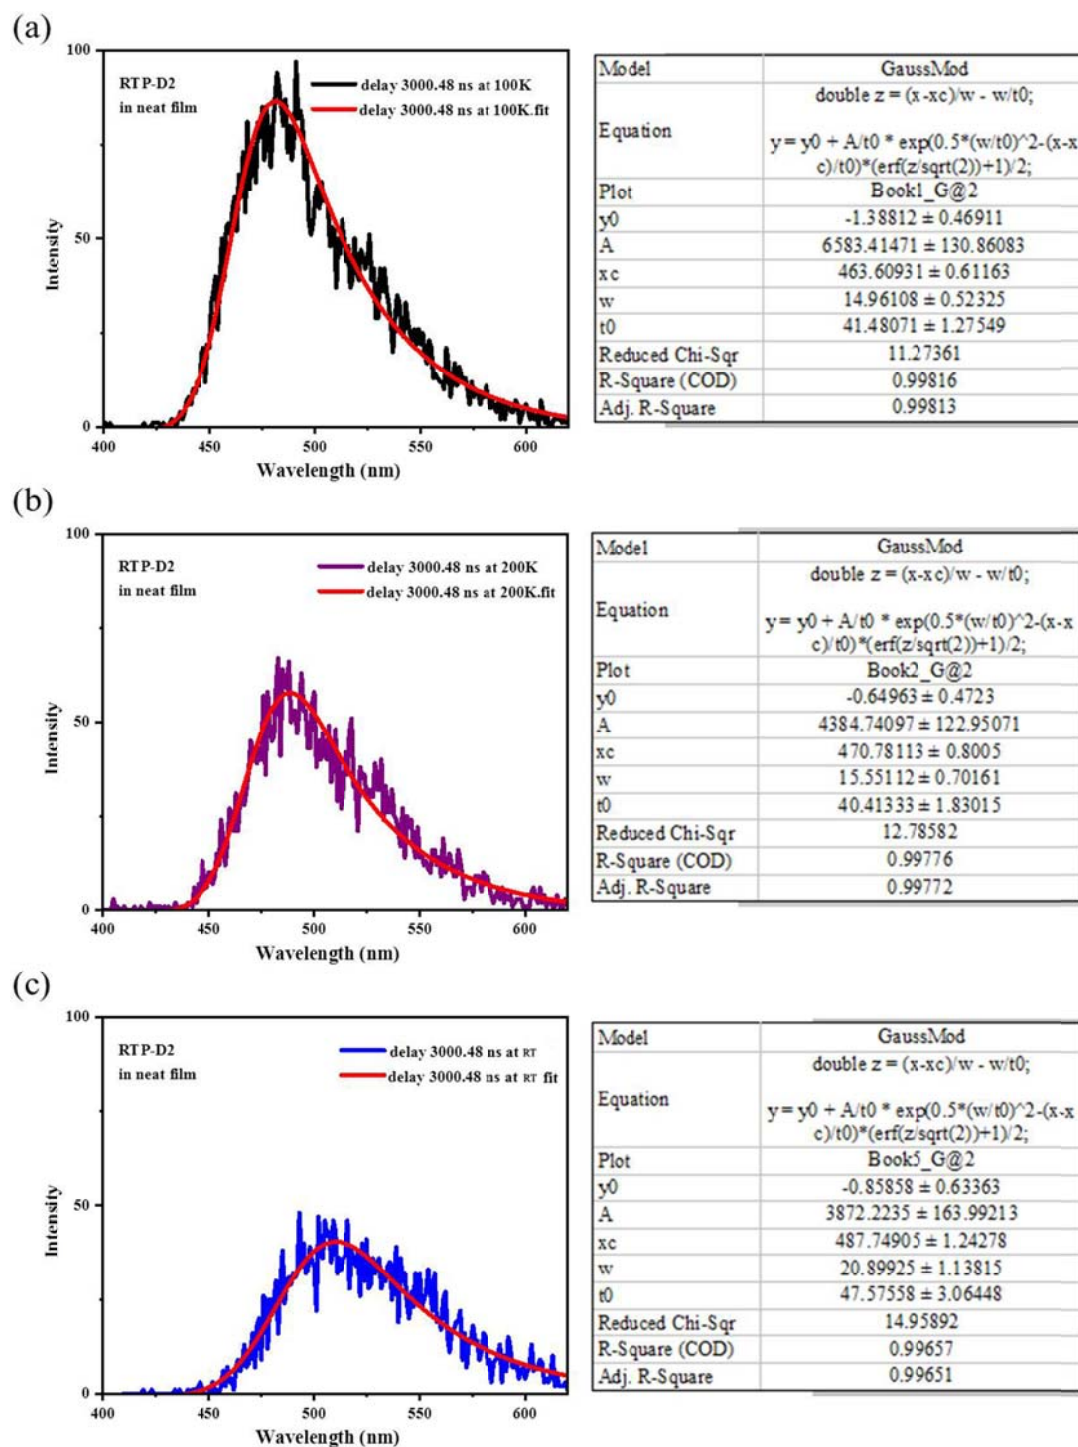

**Supplementary Figure 13.** GaussMod fitting for the TRES collected at 3000.48 ns:

(a) at 100 K; (b) at 200 K; (c) at room temperature.

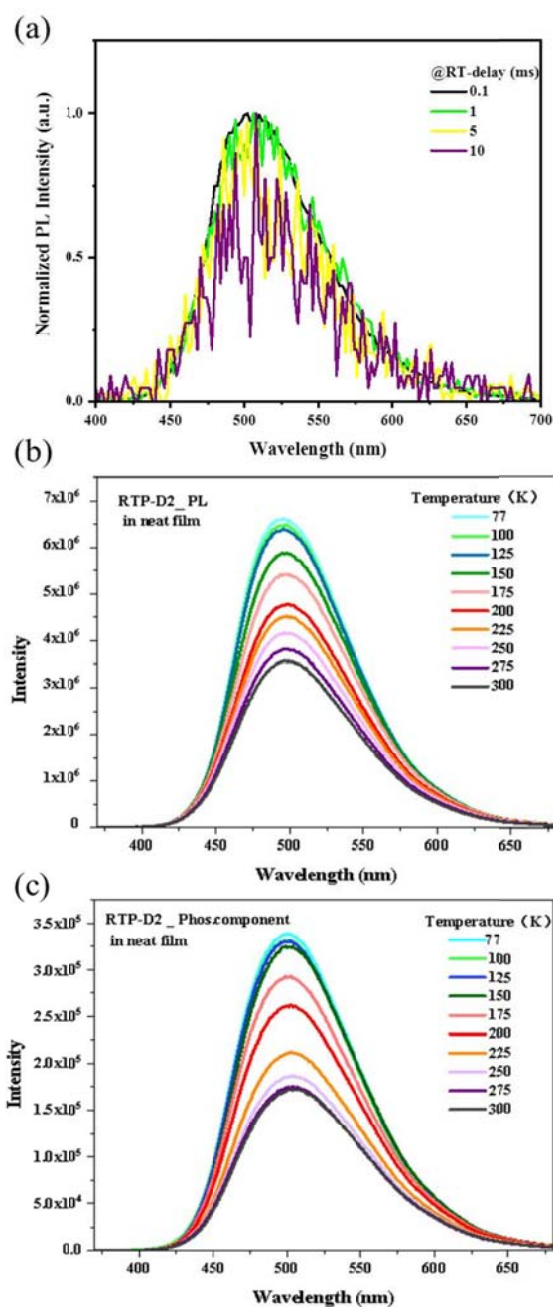

**Supplementary Figure 14.** (a) PL spectra at different delay times for the RTP-D2 film; (b) Temperature-dependent PL spectra (without a delay) for the RTP-D2 film; (c) Temperature-dependent phosphorescence spectra (with a 0.1 ms delay) for the RTP-D2 film. As one can see, the PL profile is nearly independent on the delay time. So a 0.1 ms delay is used for the measurement of phosphorescence spectra.

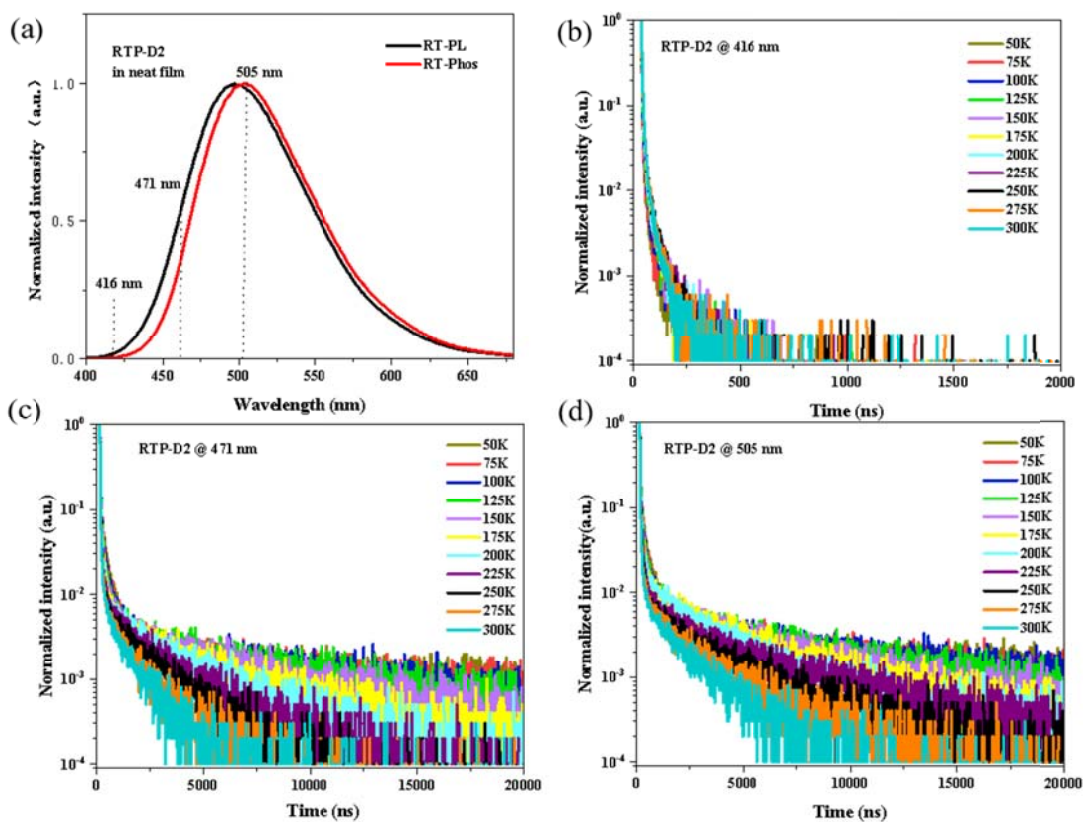

**Supplementary Figure 15.** PL and RTP spectra (a), and temperature-dependent transient PL spectra detected at a wavelength of 416 nm (b), 471 nm (c) and 505 nm (d) for RTP-D2 in neat film.

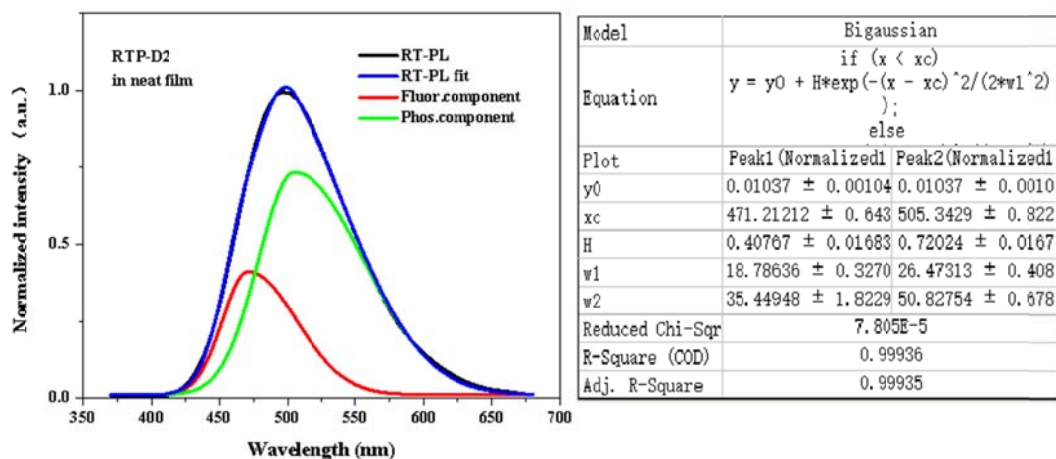

**Supplementary Figure 16.** Bigaussian fitting of the steady-state PL spectra for the RTP-D2 film. Given that fluorescence is dominated in the TRES spectra at the beginning, the peak of TRES spectrum at 0.103 ns (471 nm) is set as the maximum fluorescent emission. Combined with the maximum phosphorescent emission (505 nm) shown in the RTP spectrum, a Bigaussian fitting is performed to divide the fluorescence and RTP. By comparing their corresponding integral area, the populations of fluorescence and RTP are taken to be 29.4% and 70.6%, respectively.



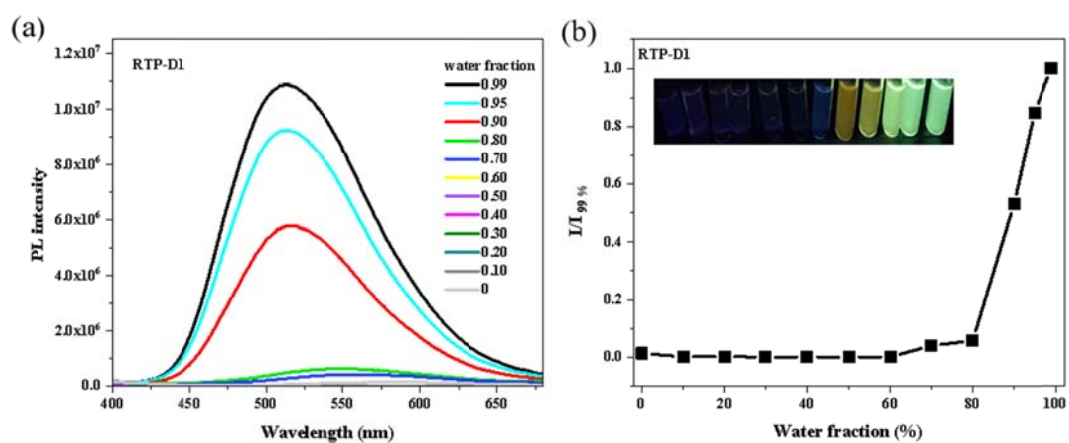

**Supplementary Figure 17.** AIE behavior of RTP-D1 in water/THF mixed solvents:

(a) Dependence of the PL spectra on the water fraction; (b) Relative emission intensity as a function of water fraction. Insets: PL images under UV light with the increasing water fraction from left to right.

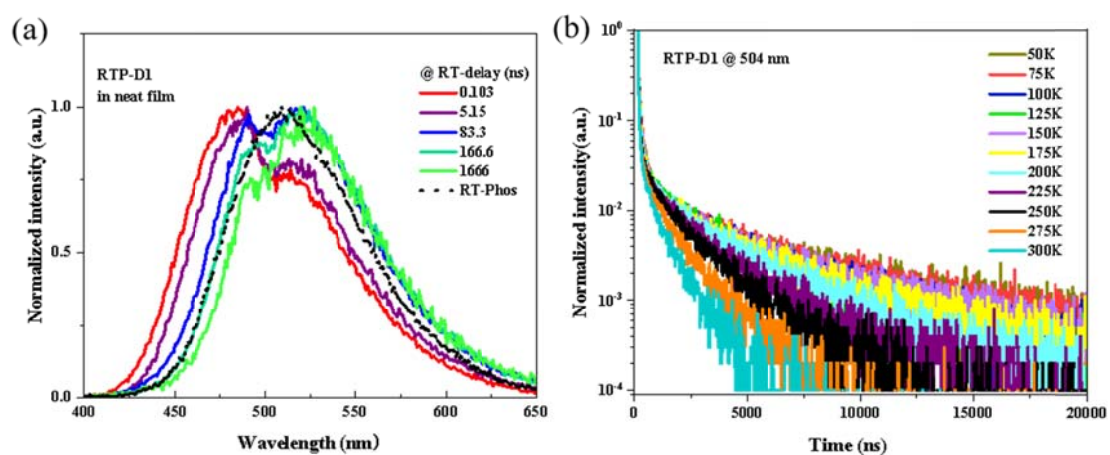

**Supplementary Figure 18.** RTP nature of RTP-D1 in neat film: (a) Time-resolved emission spectra compared with the corresponding phosphorescent spectrum at room temperature; (b) Temperature-dependent transient PL spectra detected at 504 nm.

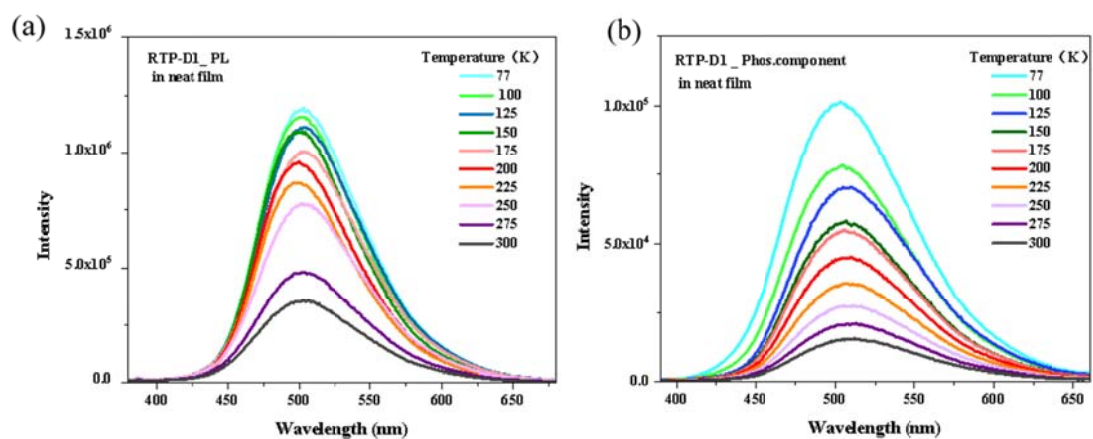

**Supplementary Figure 19.** (a) Temperature-dependent PL spectra (without a delay) for the RTP-D1 film; (b) Temperature-dependent phosphorescence spectra (with a 0.1 ms delay) for the RTP-D1 film.

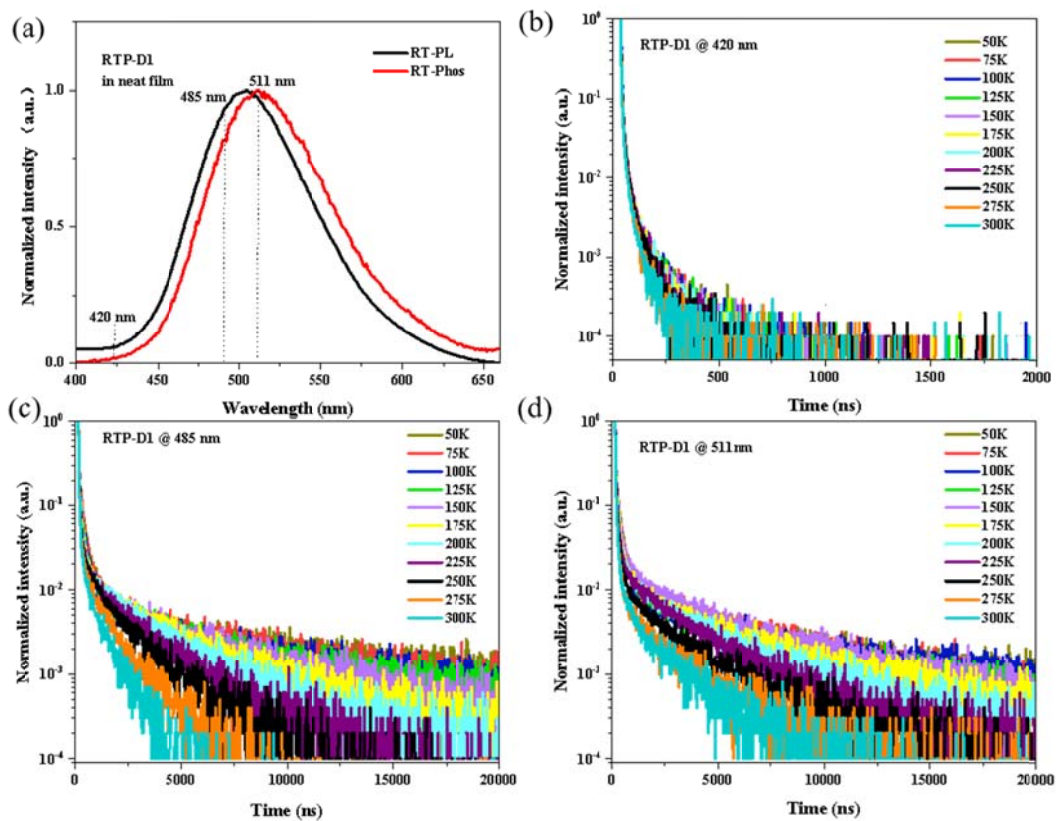

**Supplementary Figure 20.** PL and RTP spectra (a), and temperature-dependent transient PL spectra detected at a wavelength of 420 nm (b), 485 nm (c) and 511 nm (d) for RTP-D1 in neat film. In the case of 420 nm (the RTP contribution is negligible), no delayed component is observed. This clearly indicates that TADF is not involved in RTP-D1.

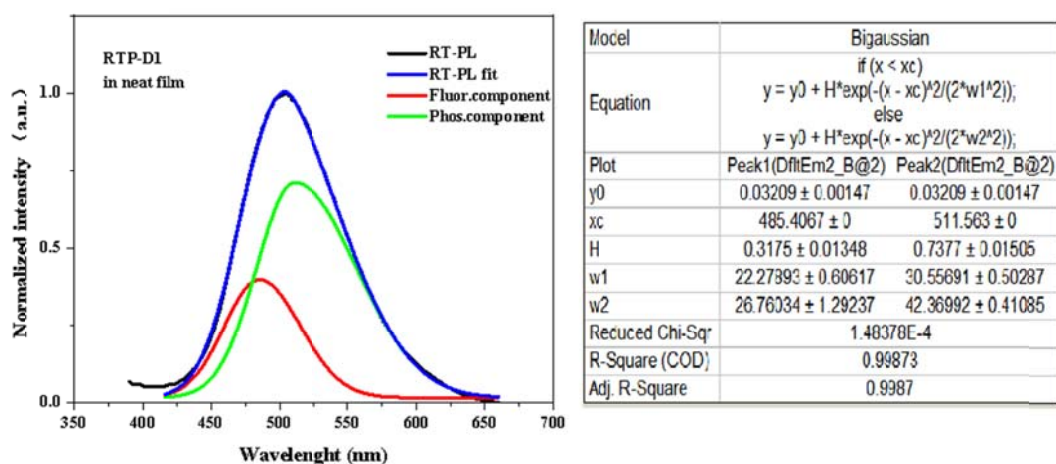

**Supplementary Figure 21.** Bigaussian fitting of the steady-state PL spectra for the RTP-D1 film. Given that fluorescence is dominated in the TRES spectra at the beginning, the peak of TRES spectrum at 0.103 ns (485 nm) is set as the maximum fluorescent emission. Combined with the maximum phosphorescent emission (511 nm) shown in the RTP spectrum, a Bigaussian fitting is performed to divide the fluorescence and RTP. By comparing their corresponding integral area, the populations of fluorescence and RTP are taken to be 33.1% and 66.9%, respectively.

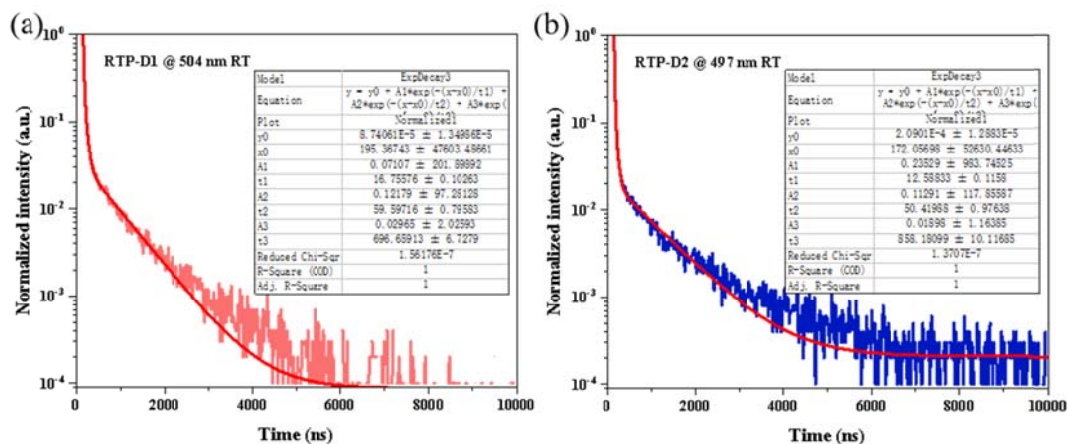

**Supplementary Figure 22.** Transient PL spectra in neat films for RTP-D1 (a) and RTP-D2 (b).

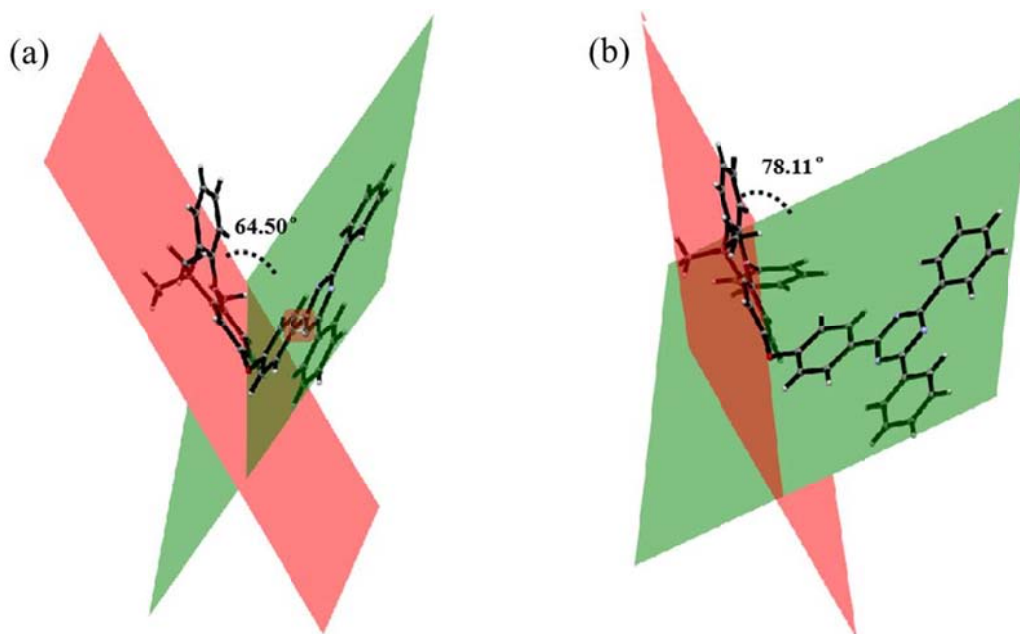

**Supplementary Figure 23.** Dihedral angle between the acridine donor and the triazine acceptor for RTP-D1 (a) and RTP-D2 (b).

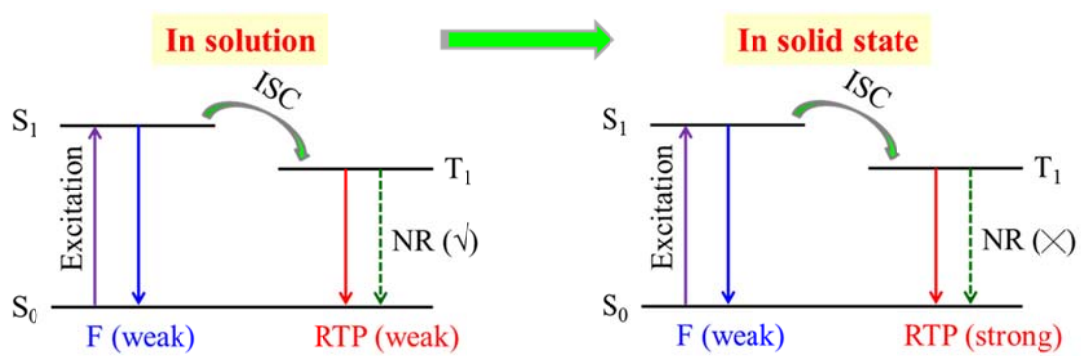

**Supplementary Figure 24.** Schematic illustration of aggregation-induced RTP for D-O-A based organic phosphors.



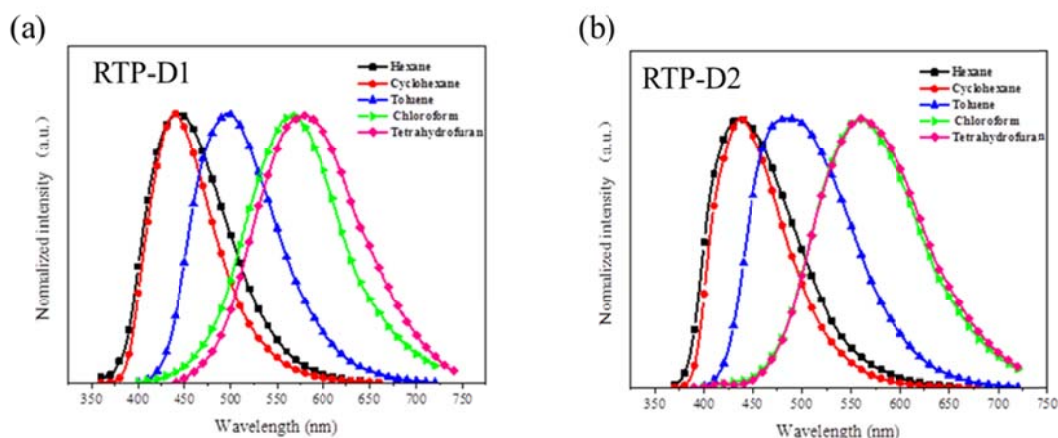

**Supplementary Figure 25.** PL spectra measured in different organic solvents in the presence of  $O_2$  for RTP-D1 (a) and RTP-D2 (b).

When the water fraction grows up, it should be noted that the PL spectra are also show a hypsochromic shift besides the enhanced emission intensity (Figure 3 and S16). As discussed above, the PL in solution with  $O_2$  is corresponding to the fluorescence, because the weak RTP is completely quenched by  $O_2$ . Due to the charge transfer (CT) nature, fluorescence is sensitive to the solvent polarity. So the emission maxima of RTP-D1 and RTP-D2 appear at about 575 nm in THF. However, in aggregates, the corresponding PL is dominantly from RTP peaked at about 500 nm. Therefore, the PL spectra are found to be blue-shifted with the increasing water fraction.

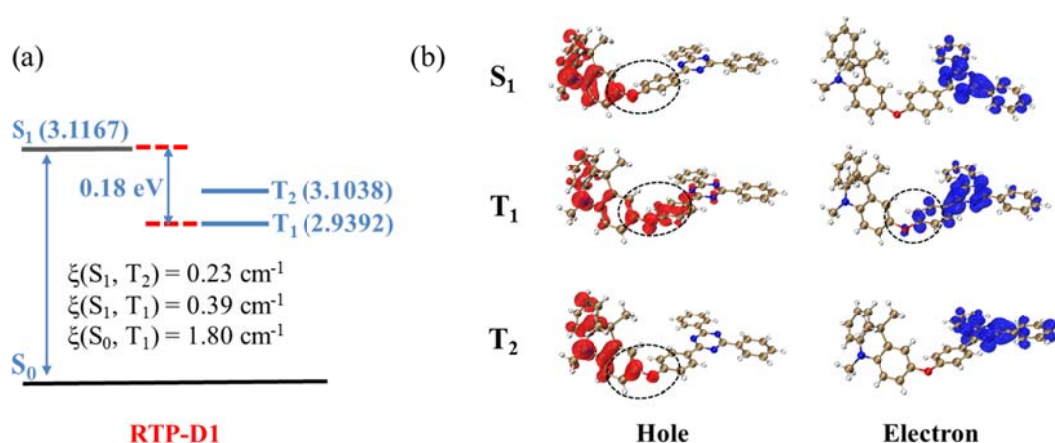

**Supplementary Figure 26.** Energy level alignment together with the spin-orbit coupling matrix elements (a), and hole and electron distributions of  $S_1$  and  $T_n$  below  $S_1$  for RTP-D1 (b).

Compared with  $S_1$ , it is found that the hole of  $T_1$  is extended from acridine and O to triazine, and the electron of  $T_1$  is extended from triazine to O. During the hole and electron migrations from  $S_1$  to  $T_1$ , both the  $n$  orbital contribution and the large dihedral angle between D and A ( $64.50^\circ$  for RTP-D1 in Figure S22) plays an important role on the orbital angular momentum change, which can compensate the spin angular momentum. Therefore, the spin flipping becomes more allowed from  $S_1$  to  $T_1$  than from  $S_1$  to  $T_2$ .

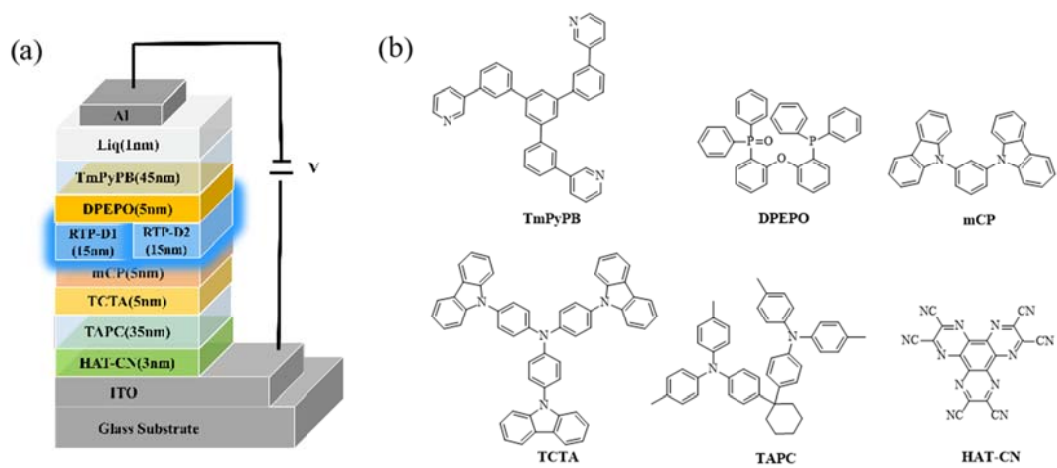

**Supplementary Figure 27.** Device configuration (a) and molecular structures of used materials (b).

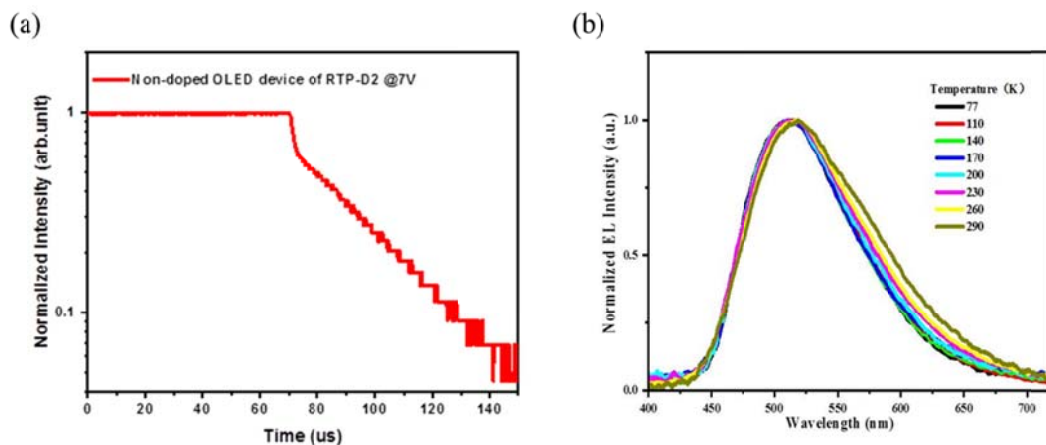

**Supplementary Figure 28.** Transient EL spectrum driven at a 7 V pulse (a) and temperature dependence of the EL spectra (b) for RTP-D2 based non-doped device. After switching off the electrical pulse, an obvious delay is observed in the transient EL, well consistent with the transient PL.

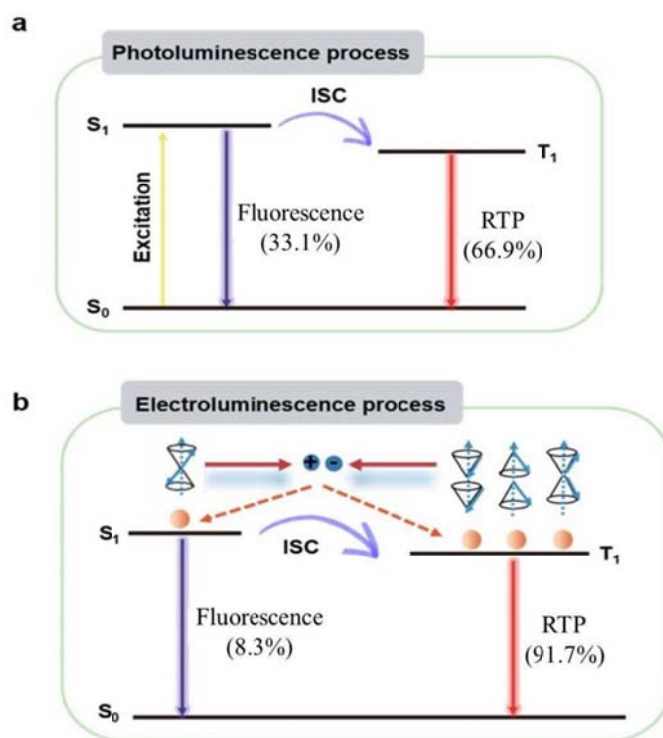

**Supplementary Figure 29.** Comparison between the PL (**a**) and EL (**b**) processes for RTP-D1. First, the Bigaussian fitting decouples 33.1% fluorescence from singlet excitons and 66.9% RTP from triplet excitons (Figure S16). Second, under photo excitation, triplet excitons must be produced only through ISC. So the ISC probability from  $S_1$  to  $T_1$  is reasonably set to be the same as that of the RTP population (66.9%). Third, under electric excitation, 25% singlet and 75% triplet excitons are often generated from the injected holes and electrons. Assuming a same ISC probability as the PL process, 25% singlet excitons can spin-flip to form 16.7% triplet excitons (25%  $\times$  66.9%). In all, a total of 91.7% (16.7% + 75%) triplet excitons contribute to the EL.

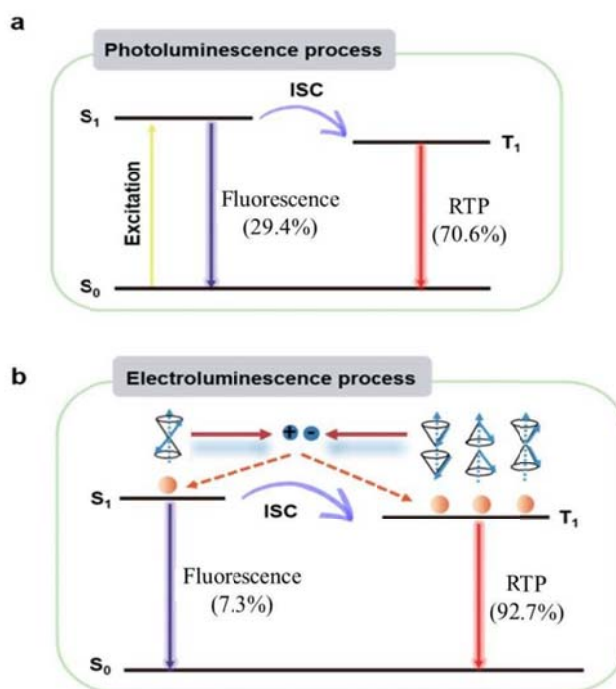

**Supplementary Figure 30.** Comparison between the PL (a) and EL (b) processes for RTP-D2. First, the Bigaussian fitting decouples 29.4% fluorescence from singlet excitons and 70.6% RTP from triplet excitons (Figure S11). Second, under photo excitation, triplet excitons must be produced only through ISC. So the ISC probability from  $S_1$  to  $T_1$  is reasonably set to be the same as that of the RTP population (70.6%). Third, under electric excitation, 25% singlet and 75% triplet excitons are often generated from the injected holes and electrons. Assuming a same ISC probability as the PL process, 25% singlet excitons can spin-flip to form 17.7% triplet excitons (25%  $\times$  70.6%). In all, a total of 92.7% (17.7% + 75%) triplet excitons contribute to the EL.

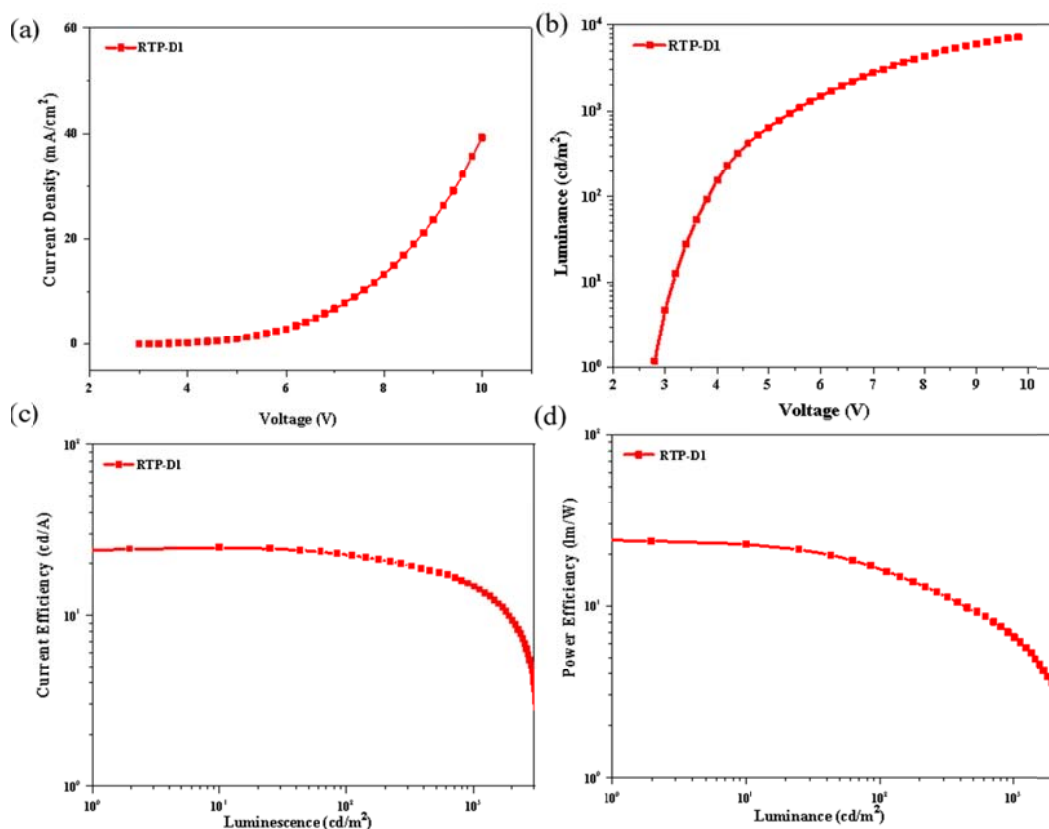

**Supplementary Figure 31.** Non-doped device performance of RTP-D1: (a) Current density–voltage characteristic; (b) Luminance–voltage characteristic; (c) Current efficiency as a function of luminance; (d) Power efficiency as a function of luminance.

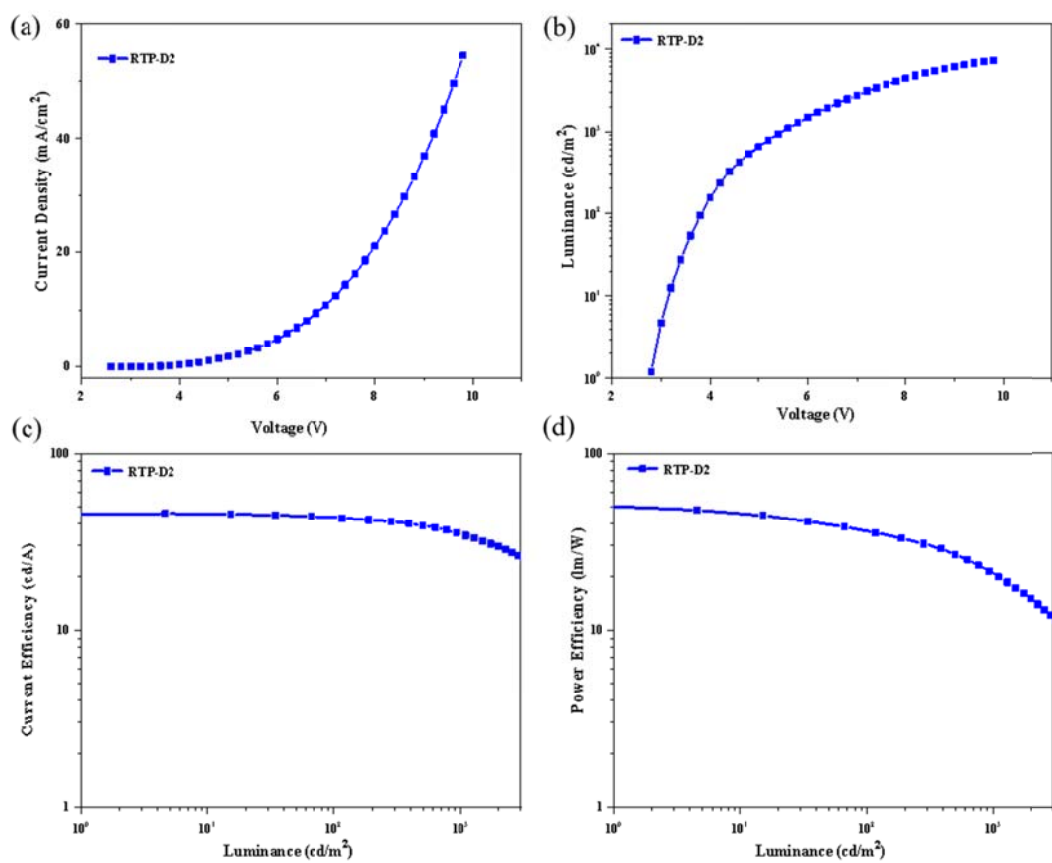

**Supplementary Figure 32.** Non-doped device performance of RTP-D2: (a) Current density–voltage characteristic; (b) Luminance–voltage characteristic; (c) Current efficiency as a function of luminance; (d) Power efficiency as a function of luminance.



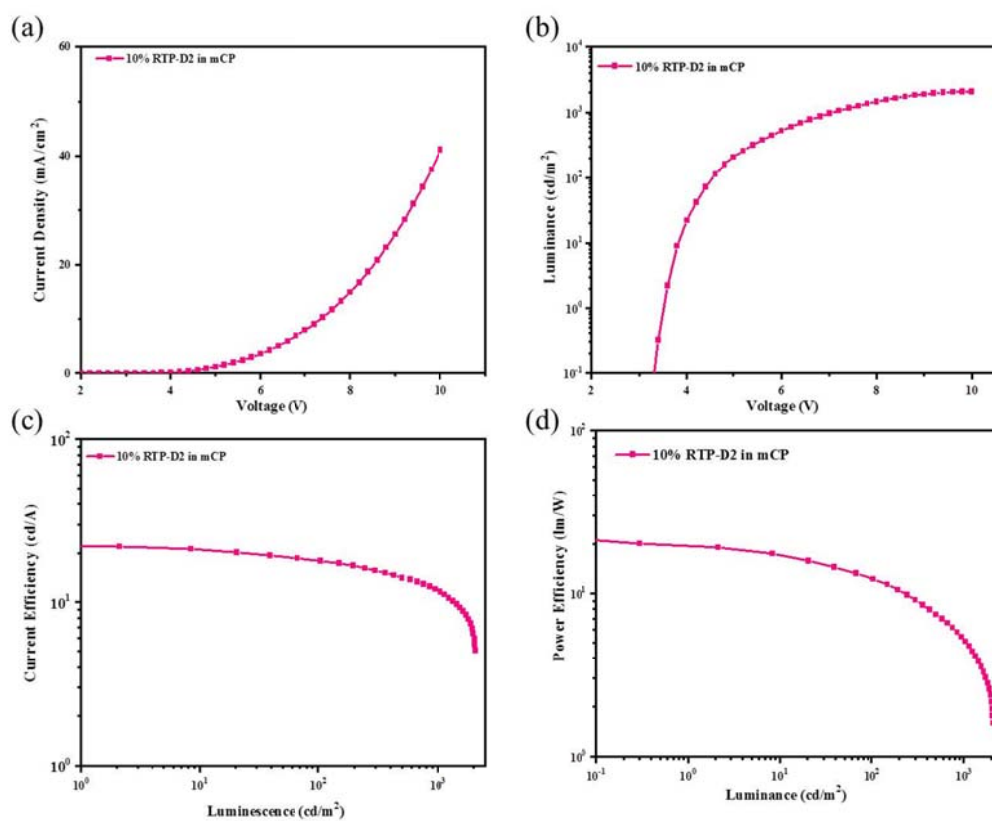

**Supplementary Figure 33.** Doped device performance of 10% RTP-D2 in mCP: (a) Current density–voltage characteristic; (b) Luminance–voltage characteristic; (c) Current efficiency as a function of luminance; (d) Power efficiency as a function of luminance.

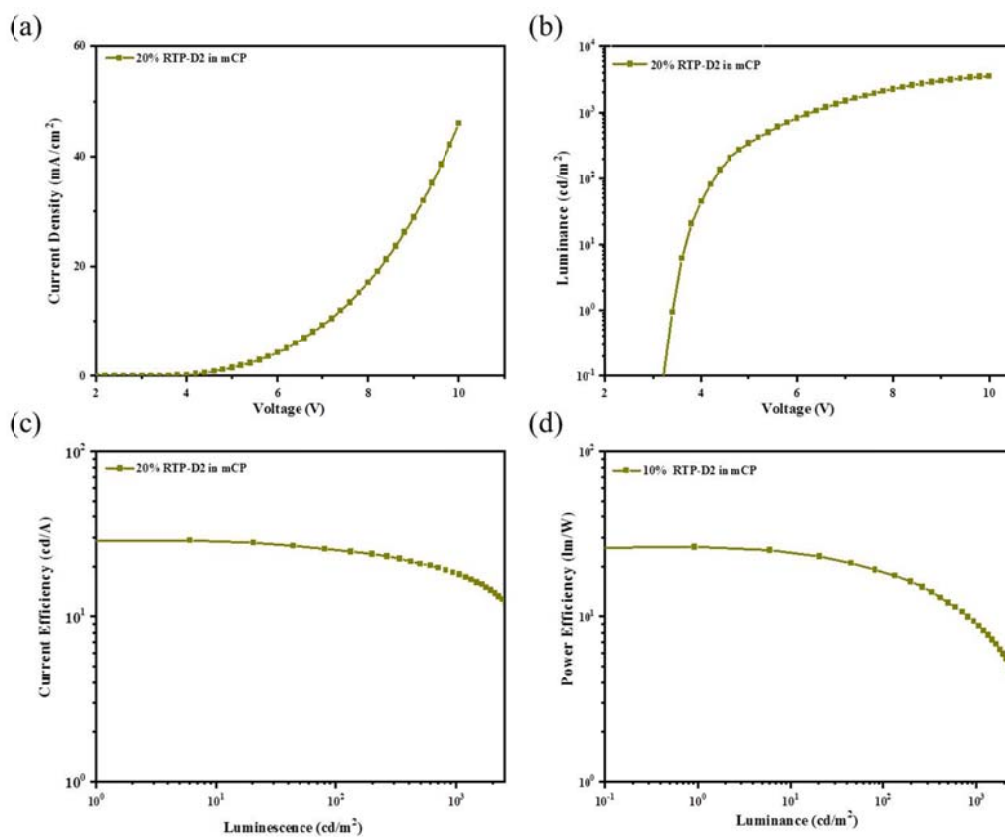

**Supplementary Figure 34.** Doped device performance of 20% RTP-D2 in mCP: (a) Current density–voltage characteristic; (b) Luminance–voltage characteristic; (c) Current efficiency as a function of luminance; (d) Power efficiency as a function of luminance.

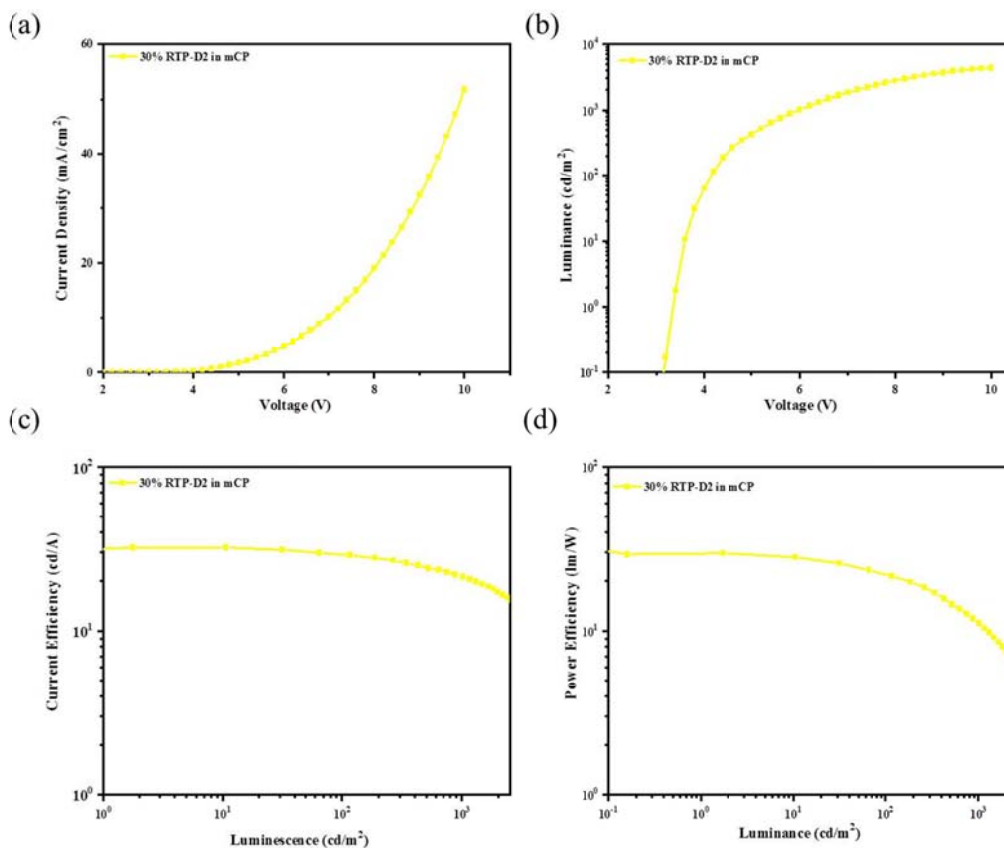

**Supplementary Figure 35.** Doped device performance of 30% RTP-D2 in mCP: (a) Current density–voltage characteristic; (b) Luminance–voltage characteristic; (c) Current efficiency as a function of luminance; (d) Power efficiency as a function of luminance.

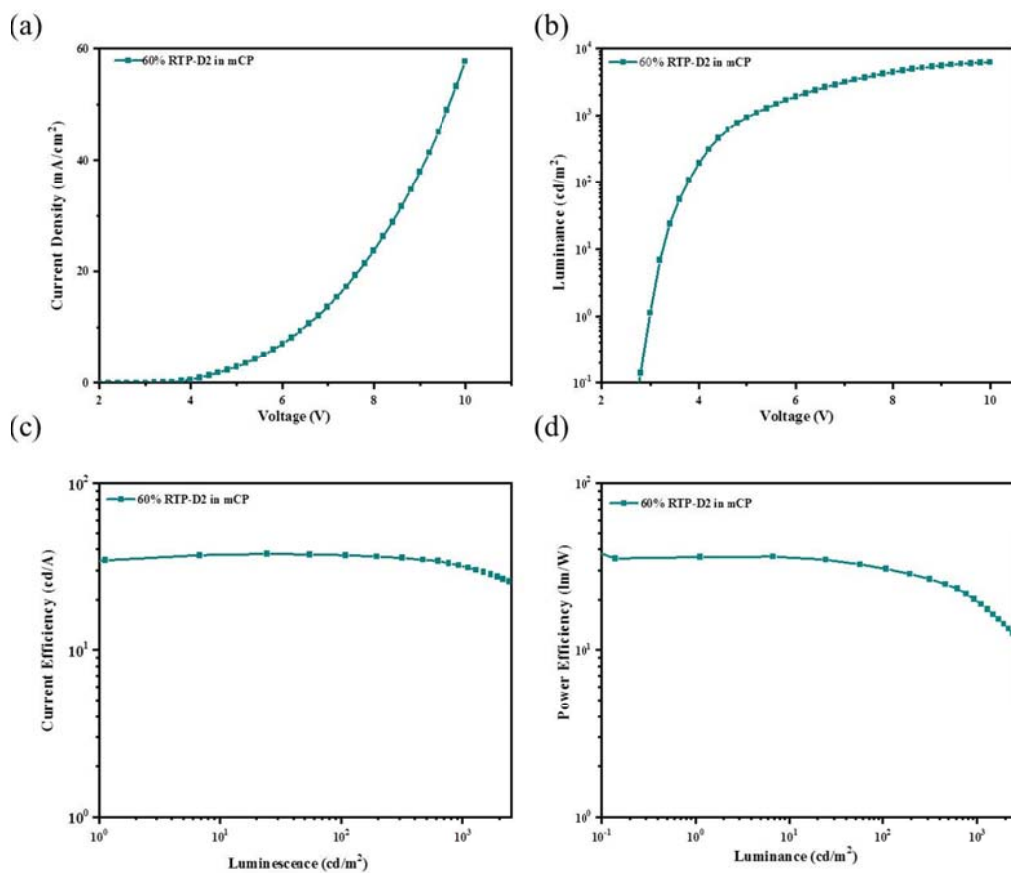

**Supplementary Figure 36.** Doped device performance of 60% RTP-D2 in mCP: (a) Current density–voltage characteristic; (b) Luminance–voltage characteristic; (c) Current efficiency as a function of luminance; (d) Power efficiency as a function of luminance.

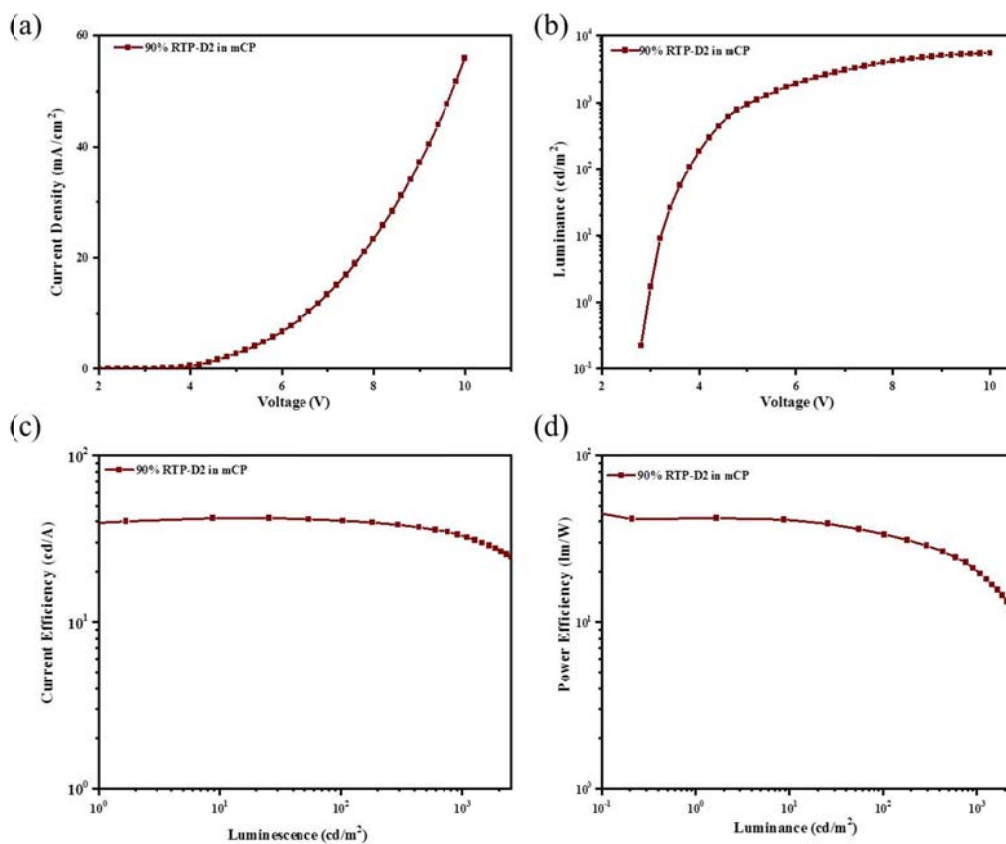

**Supplementary Figure 37.** Doped device performance of 90% RTP-D2 in mCP: (a) Current density–voltage characteristic; (b) Luminance–voltage characteristic; (c) Current efficiency as a function of luminance; (d) Power efficiency as a function of luminance.

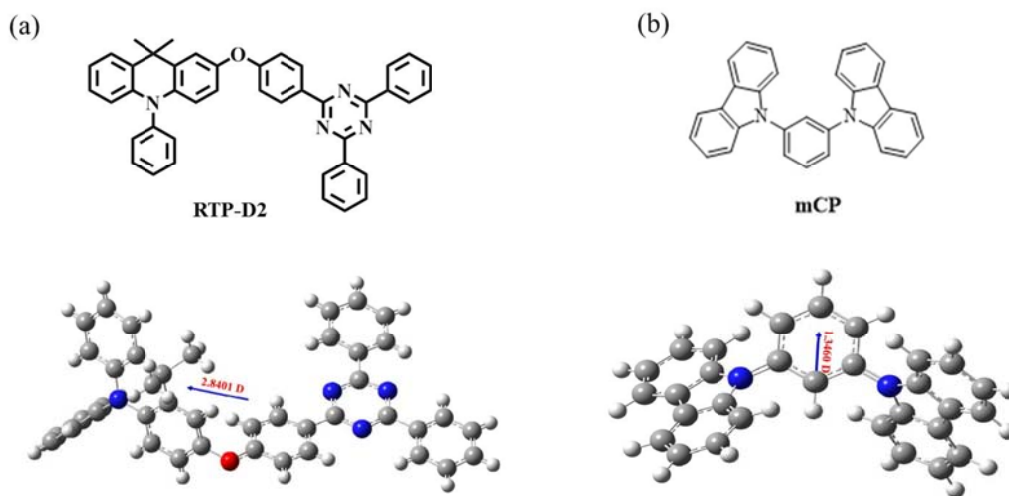

**Supplementary Figure 38.** Dipole moment for RTP-D2 (a) and mCP (b). According to the theoretical calculation, the dipole moment is estimated to be 2.8401 D and 1.3460 D for RTP-D2 and mCP, respectively.

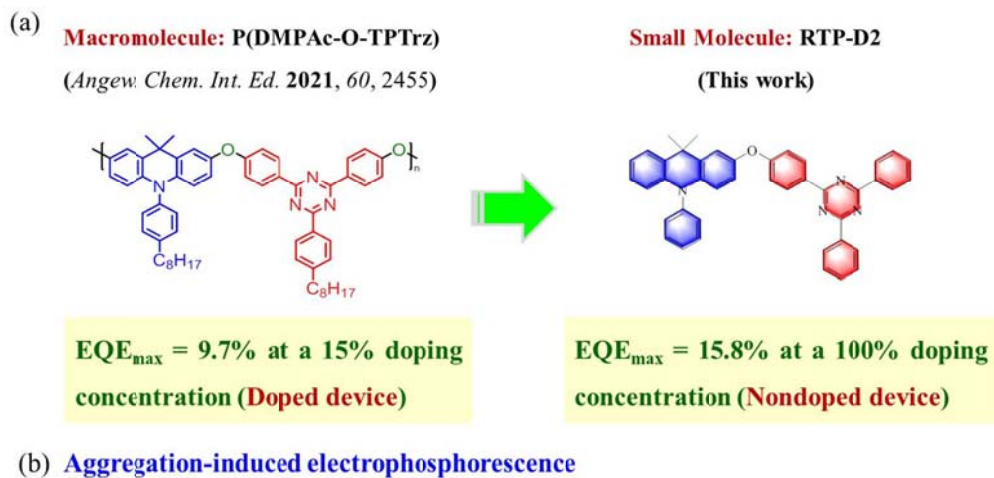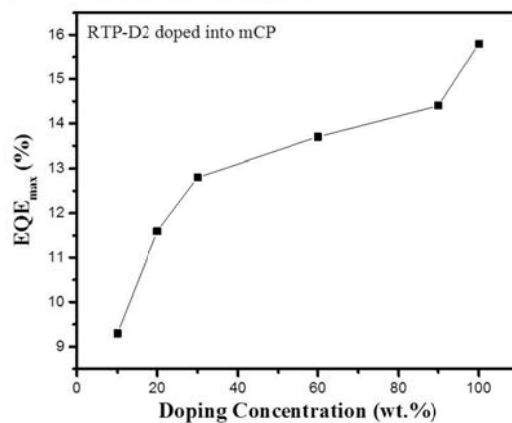

**Supplementary Figure 39.** (a) Comparison between D-O-A based polymer and small molecule; (b) Maximum EQE as a function of doping concentration for RTP-D2 in mCP.

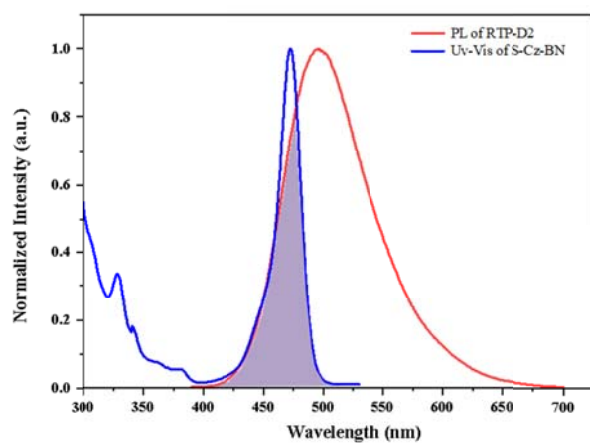

**Supplementary Figure 40.** Overlap between the absorption of S-Cz-BN and the PL of RTP-D2.



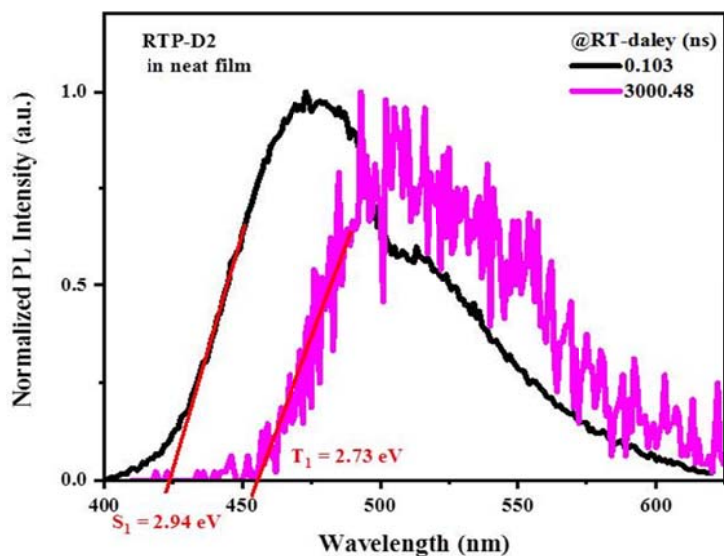

**Supplementary Figure 41.** Determination of the energy levels of  $S_1$  and  $T_1$  for RTP-D2. According to the TRES analysis, fluorescence and phosphorescence dominate the PL at a delay time of 0.103 ns and 3000.48 ns, respectively. Therefore, their onset values are reasonably taken as the  $S_1$  and  $T_1$  energies of RTP-D2.

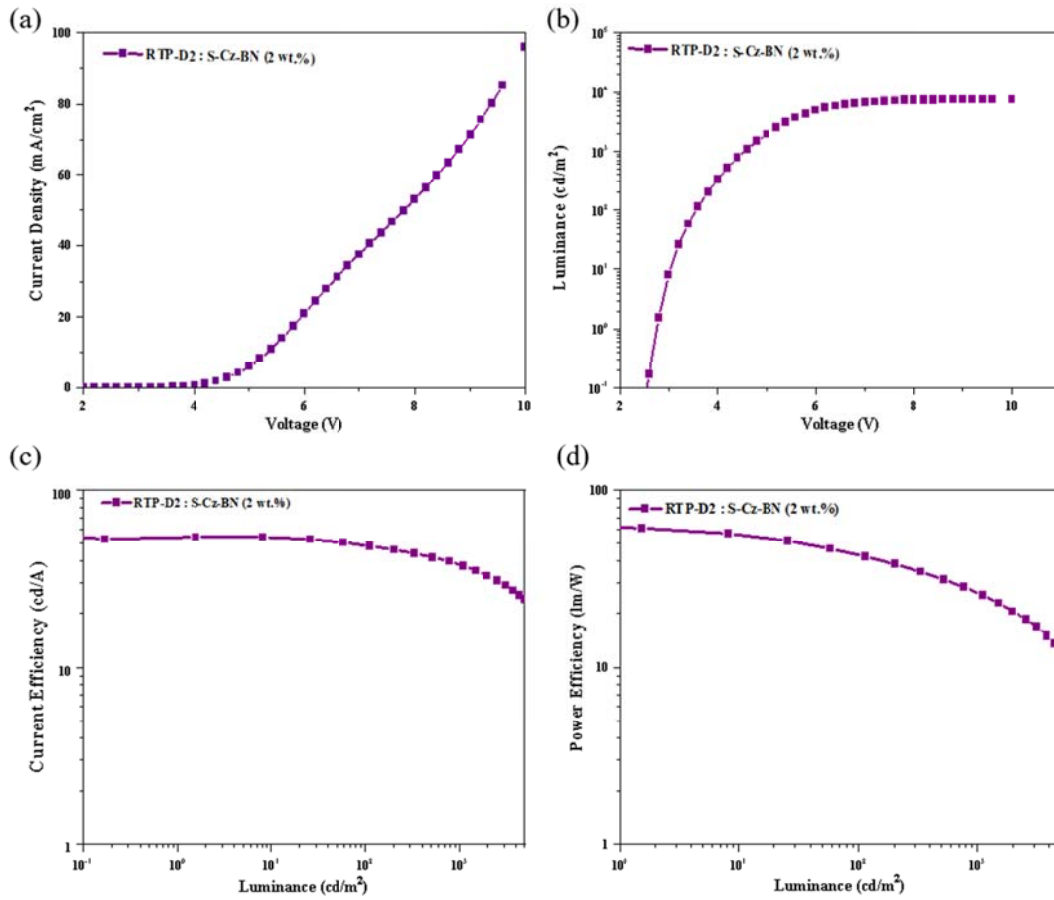

**Supplementary Figure 42.** Device performance of RTP-D2 : S-Cz-BN (2 wt.%) based host-free sensitization: (a) Current density–voltage characteristic; (b) Luminance–voltage characteristic; (c) Current efficiency as a function of luminance; (d) Power efficiency as a function of luminance.

## Supplementary Tables

**Supplementary Table 1.** X-Crystal data and structure refinement for RTP-D1 and RTP-D2.

|                                             | RTP-D1                                                                    | RTP-D2                                                                  |
|---------------------------------------------|---------------------------------------------------------------------------|-------------------------------------------------------------------------|
| Empirical formula                           | C37H30N4O                                                                 | C42H32N4O                                                               |
| Formula weight                              | 546.65                                                                    | 608.71                                                                  |
| Temperature/K                               | 150 K                                                                     | 150 K                                                                   |
| Crystal system                              | Triclinic                                                                 | Orthorhombic                                                            |
| Space group                                 | P-1                                                                       | Pbca                                                                    |
| a/Å                                         | 7.9086 (13)                                                               | 24.563 (5)                                                              |
| b/Å                                         | 13.696 (2)                                                                | 7.4471 (16)                                                             |
| c/Å                                         | 14.996 (2)                                                                | 34.619 (7)                                                              |
| $\alpha$ /°                                 | 63.761 (6)                                                                | 90                                                                      |
| $\beta$ /°                                  | 79.572 (6)                                                                | 90                                                                      |
| $\gamma$ /°                                 | 74.229 (7)                                                                | 90                                                                      |
| Volume/Å <sup>3</sup>                       | 1398.6 (4)                                                                | 6333 (2)                                                                |
| Z                                           | 2                                                                         | 8                                                                       |
| $\rho_{\text{calc}}$ mg/cm <sup>3</sup>     | 1.298                                                                     | 1.277                                                                   |
| Absorption coefficient/mm                   | 0.079                                                                     | 0.078                                                                   |
| F(000)                                      | 576                                                                       | 2560                                                                    |
| Crystal size/mm <sup>3</sup>                | 0.34 x 0.28 x 0.19                                                        | 0.32 x 0.3 x 0.14                                                       |
| Radiation                                   | MoK $\alpha$ (0.71073 Å)                                                  | MoK $\alpha$ (0.71073 Å)                                                |
| Theta range for data collection/°           | 2.683 to 28.391                                                           | 2.033 to 24.998                                                         |
| Index ranges                                | -10 $\leq$ h $\leq$ 10, -18 $\leq$ k $\leq$ 18,<br>-20 $\leq$ l $\leq$ 19 | -24 $\leq$ h $\leq$ 29, -8 $\leq$ k $\leq$ 8,<br>-41 $\leq$ l $\leq$ 31 |
| Reflections collected                       | 49202                                                                     | 31687                                                                   |
| Independent reflections                     | 7004 [R(int) = 0.0825]                                                    | 5571 [R(int) = 0.1079]                                                  |
| Data/restraints/parameters                  | 7004 / 0 / 382                                                            | 5571 / 0 / 426                                                          |
| Goodness-of-fit on F <sup>2</sup>           | 1.032                                                                     | 0.943                                                                   |
| Final R indexes [I $\geq$ 2 $\sigma$ (I)]   | R <sub>1</sub> = 0.0491, wR <sub>2</sub> = 0.1268                         | R <sub>1</sub> = 0.0576, wR <sub>2</sub> = 0.1289                       |
| Final R indexes [all data]                  | R <sub>1</sub> = 0.0774, wR <sub>2</sub> = 0.1508                         | R <sub>1</sub> = 0.1154, wR <sub>2</sub> = 0.1562                       |
| Largest diff. peak/hole / e Å <sup>-3</sup> | 0.716 and -0.285                                                          | 0.248 and -0.254                                                        |

**Supplementary Table 2.** Photophysical properties and related parameters of RTP-D1 and RTP-D2.

| Emitter                                            | RTP-D1 | RTP-D2 |
|----------------------------------------------------|--------|--------|
| $\tau_F$ [ns]                                      | 16.8   | 12.6   |
| F population [%] <sup>a</sup>                      | 33.1   | 29.4   |
| $\tau_P$ [ns]                                      | 488.8  | 641.4  |
| RTP population [%] <sup>a</sup>                    | 66.9   | 70.6   |
| $\Phi_F$ [%] <sup>b</sup>                          | 18.2   | 22.8   |
| $\Phi_P$ [%] <sup>b</sup>                          | 36.7   | 54.7   |
| $\Phi_{PL}$ [%] <sup>b</sup>                       | 54.9   | 77.5   |
| $k_r^F$ [ $10^7$ S <sup>-1</sup> ] <sup>c</sup>    | 1.1    | 1.8    |
| $k_{nr}^F$ [ $10^8$ S <sup>-1</sup> ] <sup>c</sup> | 0.27   | 0.18   |
| $k_r^P$ [ $10^5$ S <sup>-1</sup> ] <sup>c</sup>    | 7.5    | 8.5    |
| $k_{nr}^P$ [ $10^6$ S <sup>-1</sup> ] <sup>c</sup> | 1.3    | 0.7    |
| $k_{ISC}$ [ $10^7$ S <sup>-1</sup> ] <sup>c</sup>  | 2.2    | 4.3    |

<sup>a</sup>Fluorescence (F) and room-temperature phosphorescence (RTP) populations were estimated from a Bigaussian fitting of the PL spectra; <sup>b</sup>The PLQYs of fluorescence ( $\Phi_F$ ) and RTP ( $\Phi_P$ ) were determined by the total PLQY ( $\Phi_{PL}$ ) and their corresponding populations; <sup>c</sup>The fluorescence radiative rate ( $k_r^F$ ), fluorescence non-radiative rate ( $k_{nr}^F$ ), phosphorescence radiative rate ( $k_r^P$ ), phosphorescence non-radiative rate ( $k_{nr}^P$ ) and intersystem crossing rate ( $k_{ISC}$ ) were obtained by the following equations:

$$\begin{aligned}
 k_r^F &= \Phi_F / \tau_F & k_{nr}^F &= (1 - \Phi_F - \Phi_P) / \tau_F & k_r^P &= \Phi_P / \tau_P \\
 k_{nr}^P &= (1 - \Phi_P) / \tau_P & k_{ISC} &= \Phi_P / \tau_F
 \end{aligned}$$

**Supplementary Table 3.** Device performance comparison of organic RTP emitters used for OLEDs.

| Year | Emitter                 | EML      | EQE <sub>max</sub><br>[%] | CE <sub>max</sub><br>[cd/A] | PE <sub>max</sub><br>[lm/W] | Reference                                                  |
|------|-------------------------|----------|---------------------------|-----------------------------|-----------------------------|------------------------------------------------------------|
| 2016 | DMFLTPD-d <sub>36</sub> | doped    | 1                         | -                           | -                           | <i>Adv. Mater.</i> <b>2016</b> , 28, 655.                  |
| 2018 | OPM                     | doped    | 0.6                       | -                           | -                           | <i>Angew. Chem. Int. Ed.</i> <b>2018</b> , 57, 16407.      |
| 2019 | 27PNDO                  | doped    | 0.11                      | -                           | -                           | <i>J. Mater. Chem. C</i> <b>2019</b> , 7, 11500.           |
| 2019 | BCZ1                    | nondoped | 5.8                       | 13.4                        | 10.5                        | <i>Adv. Mater.</i> <b>2019</b> , 31, 1904273.              |
| 2019 | DPTZN                   | doped    | 11.5                      | 33.8                        | 32.6                        | <i>J. Phys. Chem. Lett.</i> <b>2019</b> , 10, 5983.        |
| 2020 | PSe1                    | doped    | 10.7                      | -                           | -                           | <i>Chem. Mater.</i> <b>2020</b> , 32, 2583.                |
| 2020 | BrPFL                   | doped    | 2.5                       | -                           | -                           | <i>ACS Appl. Mater. Interfaces</i> <b>2020</b> , 12, 6137. |
| 2021 | SiAz                    | doped    | 4.06                      | -                           | -                           | <i>ACS Appl. Mater. Interfaces</i> <b>2021</b> , 13, 2899. |
| 2021 | pBZ-DPA                 | doped    | 4.3                       | 6.8                         | 6.3                         | <i>Dyes and Pigments</i> <b>2021</b> , 195, 109729.        |
| 2021 | BuPhSe                  | doped    | 9.0                       | 28.39                       | 22.29                       | <i>J. Mater. Chem. C</i> <b>2021</b> , 9, 8233.            |
| 2022 | RTP-D1                  | nondoped | 8.6                       | 24.7                        | 24.4                        | This work                                                  |
|      | RTP-D2                  | nondoped | 15.8                      | 45.8                        | 50.4                        |                                                            |

CE: current efficiency; PE: power efficiency; EQE: external quantum efficiency.

**Supplementary Table 4.** Device performance dependence on the doping concentration of RTP-D2.

| Doping ratio | $V_{on}^a$ | CE <sup>b</sup> | PE <sup>b</sup> | EQE <sup>b</sup> |
|--------------|------------|-----------------|-----------------|------------------|
| 10 %         | 3.4        | 22.0/11.6       | 19.2/5.1        | 9.3/4.9          |
| 20 %         | 3.4        | 28.8/17.9       | 25.1/8.8        | 11.6/7.0         |
| 30 %         | 3.4        | 32.2/21.3       | 29.8/11.2       | 12.8/8.4         |
| 60 %         | 3          | 38.2/30.1       | 36.0/18.8       | 13.7/9.4         |
| 90 %         | 3          | 42.0/32.2       | 42.0/19.4       | 14.4/11.0        |
| 100 %        | 2.8        | 45.8/35.5       | 50.4/21.4       | 15.8/11.7        |

<sup>a</sup>Turn-on voltage at 1 cd/m<sup>2</sup>; <sup>b</sup>Data at maximum and 1000 cd/m<sup>2</sup>. CE: current efficiency; PE: power efficiency; EQE: external quantum efficiency.
